# Supplementary material for: Anti-Inflammatory Mechanisms of Xuefu Zhuyu Decoction in The Treatment of Atherosclerosis Based on Network Pharmacology and Microarray Data Differences Analysis
Source: Research Square preprint supplement (doi:10.21203/rs.3.rs-184004/v1), 2021-02-12
Supplement: Supplementary file 1 [file 06283f016aebfc4afa2c2fad.docx]

**Supplementary material 2**

**Targets of effective components**

Since different herbs may contain the same component and different components may act on the same target, there are duplicate targets in the table. After removing the duplicate values, there are a total of 126 targets.

| NO. | Mol ID | Mol Name | Target | Symbol |
| --- | --- | --- | --- | --- |
| 1 | MOL001645 | Linoleyl acetate | Prostaglandin G/H synthase 1 | PTGS1 |
| 2 | MOL001645 | Linoleyl acetate | Nuclear receptor coactivator 2 | NCOA2 |
| 3 | MOL000449 | Stigmasterol | Progesterone receptor | PGR |
| 4 | MOL000449 | Stigmasterol | Mineralocorticoid receptor | NR3C2 |
| 5 | MOL000449 | Stigmasterol | Nuclear receptor coactivator 2 | NCOA2 |
| 6 | MOL000449 | Stigmasterol | Nuclear receptor coactivator 1 | NCOA1 |
| 7 | MOL000449 | Stigmasterol | Prostaglandin G/H synthase 1 | PTGS1 |
| 8 | MOL000449 | Stigmasterol | Aldose reductase | AKR1B1 |
| 9 | MOL000449 | Stigmasterol | Urokinase-type plasminogen activator | PLAU |
| 10 | MOL000449 | Stigmasterol | Chymotrypsinogen B | CTRB1 |
| 11 | MOL000449 | Stigmasterol | Muscarinic acetylcholine receptor M3 | CHRM3 |
| 12 | MOL000449 | Stigmasterol | Muscarinic acetylcholine receptor M1 | CHRM1 |
| 13 | MOL000449 | Stigmasterol | Alpha-1A adrenergic receptor | ADRA1A |
| 14 | MOL000449 | Stigmasterol | Muscarinic acetylcholine receptor M2 | CHRM2 |
| 15 | MOL000449 | Stigmasterol | Gamma-aminobutyric acid receptor subunit alpha-1 | GABRA1 |
| 16 | MOL000354 | isorhamnetin | Prostaglandin G/H synthase 1 | PTGS1 |
| 17 | MOL000354 | isorhamnetin | Estrogen receptor | ESR1 |
| 18 | MOL000354 | isorhamnetin | Androgen receptor | AR |
| 19 | MOL000354 | isorhamnetin | Peroxisome proliferator activated receptor gamma | PPARG |
| 20 | MOL000354 | isorhamnetin | Estrogen receptor beta | ESR2 |
| 21 | MOL000354 | isorhamnetin | Glycogen synthase kinase-3 beta | GSK3B |
| 22 | MOL000354 | isorhamnetin | Trypsin-1 | PRSS1 |
| 23 | MOL000354 | isorhamnetin | Nuclear receptor coactivator 2 | NCOA2 |
| 24 | MOL000354 | isorhamnetin | Serine/threonine-protein kinase Chk1 | CHEK1 |
| 25 | MOL000354 | isorhamnetin | Aldose reductase | AKR1B1 |
| 26 | MOL000354 | isorhamnetin | Nuclear receptor coactivator 1 | NCOA1 |
| 27 | MOL000354 | isorhamnetin | Coagulation factor VII | F7 |
| 28 | MOL000354 | isorhamnetin | Acetylcholinesterase | ACHE |
| 29 | MOL000354 | isorhamnetin | Gamma-aminobutyric acid receptor subunit alpha-1 | GABRA1 |
| 30 | MOL000354 | isorhamnetin | Glutamate receptor 2 | GRIA2 |
| 31 | MOL000354 | isorhamnetin | Transcription factor p65 | RELA |
| 32 | MOL000354 | isorhamnetin | Oxidized low-density lipoprotein receptor 1 | OLR1 |
| 33 | MOL000422 | kaempferol | Prostaglandin G/H synthase 1 | PTGS1 |
| 34 | MOL000422 | kaempferol | Androgen receptor | AR |
| 35 | MOL000422 | kaempferol | Peroxisome proliferator activated receptor gamma | PPARG |
| 36 | MOL000422 | kaempferol | Nuclear receptor coactivator 2 | NCOA2 |
| 37 | MOL000422 | kaempferol | Trypsin-1 | PRSS1 |
| 38 | MOL000422 | kaempferol | Progesterone receptor | PGR |
| 39 | MOL000422 | kaempferol | Muscarinic acetylcholine receptor M1 | CHRM1 |
| 40 | MOL000422 | kaempferol | Acetylcholinesterase | ACHE |
| 41 | MOL000422 | kaempferol | Muscarinic acetylcholine receptor M2 | CHRM2 |
| 42 | MOL000422 | kaempferol | Gamma-aminobutyric acid receptor subunit alpha-1 | GABRA1 |
| 43 | MOL000422 | kaempferol | Coagulation factor VII | F7 |
| 44 | MOL000422 | kaempferol | Transcription factor p65 | RELA |
| 45 | MOL000422 | kaempferol | Inhibitor of nuclear factor kappa-B kinase subunit beta | IKBKB |
| 46 | MOL000422 | kaempferol | Apoptosis regulator Bcl-2 | BCL2 |
| 47 | MOL000422 | kaempferol | Activator of 90 kDa heat shock protein ATPase homolog 1 | AHSA1 |
| 48 | MOL000422 | kaempferol | Caspase-3 | CASP3 |
| 49 | MOL000422 | kaempferol | Mitogen-activated protein kinase 8 | MAPK8 |
| 50 | MOL000422 | kaempferol | Peroxisome proliferator-activated receptor gamma | PPARG |
| 51 | MOL000422 | kaempferol | Cytochrome P450 3A4 | CYP3A4 |
| 52 | MOL000422 | kaempferol | Cytochrome P450 1A1 | CYP1A1 |
| 53 | MOL000422 | kaempferol | Intercellular adhesion molecule 1 | ICAM1 |
| 54 | MOL000422 | kaempferol | E-selectin | SELE |
| 55 | MOL000422 | kaempferol | Vascular cell adhesion protein 1 | VCAM1 |
| 56 | MOL000422 | kaempferol | Cytochrome P450 1B1 | CYP1B1 |
| 57 | MOL000422 | kaempferol | Arachidonate 5-lipoxygenase | ALOX5 |
| 58 | MOL000422 | kaempferol | Glutathione S-transferase P | GSTP1 |
| 59 | MOL000422 | kaempferol | Aryl hydrocarbon receptor | AHR |
| 60 | MOL000422 | kaempferol | 26S proteasome non-ATPase regulatory subunit 3 | PSMD3 |
| 61 | MOL000422 | kaempferol | Solute carrier family 2, facilitated glucose transporter member 4 | SLC2A4 |
| 62 | MOL000422 | kaempferol | Nuclear receptor subfamily 1 group I member 3 | NR1I3 |
| 63 | MOL000422 | kaempferol | Type I iodothyronine deiodinase | DIO1 |
| 64 | MOL000422 | kaempferol | Glutathione S-transferase Mu 1 | GSTM1 |
| 65 | MOL000422 | kaempferol | Glutathione S-transferase Mu 2 | GSTM2 |
| 66 | MOL000422 | kaempferol | Aldo-keto reductase family 1 member C3 | AKR1C3 |
| 67 | MOL004598 | 3,5,6,7-tetramethoxy-2-(3,4,5-trimethoxyphenyl)chromone | Estrogen receptor | ESR1 |
| 68 | MOL004598 | 3,5,6,7-tetramethoxy-2-(3,4,5-trimethoxyphenyl)chromone | Androgen receptor | AR |
| 69 | MOL004598 | 3,5,6,7-tetramethoxy-2-(3,4,5-trimethoxyphenyl)chromone | Coagulation factor VII | F7 |
| 70 | MOL004598 | 3,5,6,7-tetramethoxy-2-(3,4,5-trimethoxyphenyl)chromone | Acetylcholinesterase | ACHE |
| 71 | MOL004598 | 3,5,6,7-tetramethoxy-2-(3,4,5-trimethoxyphenyl)chromone | Estrogen receptor beta | ESR2 |
| 72 | MOL004598 | 3,5,6,7-tetramethoxy-2-(3,4,5-trimethoxyphenyl)chromone | Trypsin-1 | PRSS1 |
| 73 | MOL004598 | 3,5,6,7-tetramethoxy-2-(3,4,5-trimethoxyphenyl)chromone | Nuclear receptor coactivator 2 | NCOA2 |
| 74 | MOL004609 | Areapillin | Androgen receptor | AR |
| 75 | MOL004609 | Areapillin | Coagulation factor VII | F7 |
| 76 | MOL004609 | Areapillin | Estrogen receptor beta | ESR2 |
| 77 | MOL004609 | Areapillin | Trypsin-1 | PRSS1 |
| 78 | MOL004609 | Areapillin | Nuclear receptor coactivator 2 | NCOA2 |
| 79 | MOL004609 | Areapillin | Nuclear receptor coactivator 1 | NCOA1 |
| 80 | MOL013187 | Cubebin | Prostaglandin G/H synthase 1 | PTGS1 |
| 81 | MOL004624 | Longikaurin A | Muscarinic acetylcholine receptor M1 | CHRM1 |
| 82 | MOL004624 | Longikaurin A | Muscarinic acetylcholine receptor M2 | CHRM2 |
| 83 | MOL004624 | Longikaurin A | Trypsin-1 | PRSS1 |
| 84 | MOL004718 | 伪-spinasterol | Progesterone receptor | PGR |
| 85 | MOL004718 | 伪-spinasterol | Mineralocorticoid receptor | NR3C2 |
| 86 | MOL004718 | 伪-spinasterol | Nuclear receptor coactivator 2 | NCOA2 |
| 87 | MOL000490 | petunidin | Prostaglandin G/H synthase 1 | PTGS1 |
| 88 | MOL000490 | petunidin | Estrogen receptor beta | ESR2 |
| 89 | MOL000490 | petunidin | Glycogen synthase kinase-3 beta | GSK3B |
| 90 | MOL000490 | petunidin | Nuclear receptor coactivator 2 | NCOA2 |
| 91 | MOL000098 | quercetin | Prostaglandin G/H synthase 1 | PTGS1 |
| 92 | MOL000098 | quercetin | Androgen receptor | AR |
| 93 | MOL000098 | quercetin | Peroxisome proliferator activated receptor gamma | PPARG |
| 94 | MOL000098 | quercetin | Nuclear receptor coactivator 2 | NCOA2 |
| 95 | MOL000098 | quercetin | Aldose reductase | AKR1B1 |
| 96 | MOL000098 | quercetin | Trypsin-1 | PRSS1 |
| 97 | MOL000098 | quercetin | Coagulation factor VII | F7 |
| 98 | MOL000098 | quercetin | Acetylcholinesterase | ACHE |
| 99 | MOL000098 | quercetin | Gamma-aminobutyric acid receptor subunit alpha-1 | GABRA1 |
| 100 | MOL000098 | quercetin | Transcription factor p65 | RELA |
| 101 | MOL000098 | quercetin | Epidermal growth factor receptor | EGFR |
| 102 | MOL000098 | quercetin | Vascular endothelial growth factor A | VEGFA |
| 103 | MOL000098 | quercetin | G1/S-specific cyclin-D1 | CCND1 |
| 104 | MOL000098 | quercetin | Apoptosis regulator Bcl-2 | BCL2 |
| 105 | MOL000098 | quercetin | Proto-oncogene c-Fos | FOS |
| 106 | MOL000098 | quercetin | Eukaryotic translation initiation factor 6 | EIF6 |
| 107 | MOL000098 | quercetin | Caspase-9 | CASP9 |
| 108 | MOL000098 | quercetin | Urokinase-type plasminogen activator | PLAU |
| 109 | MOL000098 | quercetin | Retinoblastoma-associated protein | RB1 |
| 110 | MOL000098 | quercetin | Interleukin-6 | IL6 |
| 111 | MOL000098 | quercetin | Activator of 90 kDa heat shock protein ATPase homolog 1 | AHSA1 |
| 112 | MOL000098 | quercetin | Caspase-3 | CASP3 |
| 113 | MOL000098 | quercetin | Cellular tumor antigen p53 | TP63 |
| 114 | MOL000098 | quercetin | ETS domain-containing protein Elk-1 | ELK1 |
| 115 | MOL000098 | quercetin | NF-kappa-B inhibitor alpha | NFKBIA |
| 116 | MOL000098 | quercetin | NADPH--cytochrome P450 reductase | POR |
| 117 | MOL000098 | quercetin | Caspase-8 | CASP8 |
| 118 | MOL000098 | quercetin | RAF proto-oncogene serine/threonine-protein kinase | RAF1 |
| 119 | MOL000098 | quercetin | Protein kinase C alpha type | PRKCA |
| 120 | MOL000098 | quercetin | Hypoxia-inducible factor 1-alpha | HIF1A |
| 121 | MOL000098 | quercetin | Protein CBFA2T1 | RUNX1T1 |
| 122 | MOL000098 | quercetin | Receptor tyrosine-protein kinase erbB-2 | ERBB2 |
| 123 | MOL000098 | quercetin | Peroxisome proliferator-activated receptor gamma | PPARG |
| 124 | MOL000098 | quercetin | Acetyl-CoA carboxylase 1 | ACACA |
| 125 | MOL000098 | quercetin | Cytochrome P450 3A4 | CYP3A4 |
| 126 | MOL000098 | quercetin | Caveolin-1 | CAV1 |
| 127 | MOL000098 | quercetin | Myc proto-oncogene protein | MYC |
| 128 | MOL000098 | quercetin | Cytochrome P450 1A1 | CYP1A1 |
| 129 | MOL000098 | quercetin | Intercellular adhesion molecule 1 | ICAM1 |
| 130 | MOL000098 | quercetin | E-selectin | SELE |
| 131 | MOL000098 | quercetin | Vascular cell adhesion protein 1 | VCAM1 |
| 132 | MOL000098 | quercetin | Prostaglandin E2 receptor EP3 subtype | PTGER3 |
| 133 | MOL000098 | quercetin | Baculoviral IAP repeat-containing protein 5 | BIRC5 |
| 134 | MOL000098 | quercetin | Dual oxidase 2 | DUOX2 |
| 135 | MOL000098 | quercetin | Nitric oxide synthase, endothelial | NOS3 |
| 136 | MOL000098 | quercetin | Heat shock protein beta-1 | HSPB1 |
| 137 | MOL000098 | quercetin | Maltase-glucoamylase, intestinal | MGAM |
| 138 | MOL000098 | quercetin | Cytochrome P450 1B1 | CYP1B1 |
| 139 | MOL000098 | quercetin | G2/mitotic-specific cyclin-B1 | CCNB1 |
| 140 | MOL000098 | quercetin | Arachidonate 5-lipoxygenase | ALOX5 |
| 141 | MOL000098 | quercetin | Glutathione S-transferase P | GSTP1 |
| 142 | MOL000098 | quercetin | Nuclear factor erythroid 2-related factor 2 | NFE2L2 |
| 143 | MOL000098 | quercetin | NAD(P)H dehydrogenase [quinone] 1 | NQO1 |
| 144 | MOL000098 | quercetin | Poly [ADP-ribose] polymerase 1 | PARP1 |
| 145 | MOL000098 | quercetin | Aryl hydrocarbon receptor | AHR |
| 146 | MOL000098 | quercetin | 26S proteasome non-ATPase regulatory subunit 3 | PSMD3 |
| 147 | MOL000098 | quercetin | Solute carrier family 2, facilitated glucose transporter member 4 | SLC2A4 |
| 148 | MOL000098 | quercetin | Collagen alpha-1(III) chain | COL3A1 |
| 149 | MOL000098 | quercetin | DDB1- and CUL4-associated factor 5 | DCAF5 |
| 150 | MOL000098 | quercetin | Nuclear receptor subfamily 1 group I member 3 | NR1I3 |
| 151 | MOL000098 | quercetin | Serine/threonine-protein kinase Chk2 | CHEK2 |
| 152 | MOL000098 | quercetin | Heat shock factor protein 1 | HSF1 |
| 153 | MOL000098 | quercetin | C-reactive protein | CRP |
| 154 | MOL000098 | quercetin | Runt-related transcription factor 2 | RUNX2 |
| 155 | MOL000098 | quercetin | Ras association domain-containing protein 1 | RASSF1 |
| 156 | MOL000098 | quercetin | Cathepsin D | CTSD |
| 157 | MOL000098 | quercetin | Insulin-like growth factor-binding protein 3 | IGFBP3 |
| 158 | MOL000098 | quercetin | Insulin-like growth factor II | IGF2 |
| 159 | MOL000098 | quercetin | Interferon regulatory factor 1 | IRF1 |
| 160 | MOL000098 | quercetin | Receptor tyrosine-protein kinase erbB-3 | ERBB3 |
| 161 | MOL000098 | quercetin | Serum paraoxonase/arylesterase 1 | PON1 |
| 162 | MOL000098 | quercetin | Type I iodothyronine deiodinase | DIO1 |
| 163 | MOL000098 | quercetin | Puromycin-sensitive aminopeptidase | NPEPPS |
| 164 | MOL000098 | quercetin | Hexokinase-2 | HK2 |
| 165 | MOL000098 | quercetin | Ras GTPase-activating protein 1 | RASA1 |
| 166 | MOL000098 | quercetin | Glutathione S-transferase Mu 1 | GSTM1 |
| 167 | MOL000098 | quercetin | Glutathione S-transferase Mu 2 | GSTM2 |
| 168 | MOL001002 | ellagic acid | Estrogen receptor | ESR1 |
| 169 | MOL001002 | ellagic acid | Androgen receptor | AR |
| 170 | MOL001002 | ellagic acid | Progesterone receptor | PGR |
| 171 | MOL001002 | ellagic acid | Transcription factor p65 | RELA |
| 172 | MOL001002 | ellagic acid | Vascular endothelial growth factor A | VEGFA |
| 173 | MOL001002 | ellagic acid | NF-kappa-B inhibitor alpha | NFKBIA |
| 174 | MOL001002 | ellagic acid | Glutathione S-transferase P | GSTP1 |
| 175 | MOL001002 | ellagic acid | Insulin-like growth factor II | IGF2 |
| 176 | MOL001002 | ellagic acid | Glutathione S-transferase Mu 1 | GSTM1 |
| 177 | MOL001002 | ellagic acid | Glutathione S-transferase Mu 2 | GSTM2 |
| 178 | MOL001918 | paeoniflorgenone | Gamma-aminobutyric acid receptor subunit alpha-1 | GABRA1 |
| 179 | MOL001924 | paeoniflorin | Interleukin-6 | IL6 |
| 180 | MOL002714 | baicalein | Prostaglandin G/H synthase 1 | PTGS1 |
| 181 | MOL002714 | baicalein | Androgen receptor | AR |
| 182 | MOL002714 | baicalein | Trypsin-1 | PRSS1 |
| 183 | MOL002714 | baicalein | Nuclear receptor coactivator 2 | NCOA2 |
| 184 | MOL002714 | baicalein | Nuclear receptor coactivator 1 | NCOA1 |
| 185 | MOL002714 | baicalein | Transcription factor p65 | RELA |
| 186 | MOL002714 | baicalein | Vascular endothelial growth factor A | VEGFA |
| 187 | MOL002714 | baicalein | Apoptosis regulator Bcl-2 | BCL2 |
| 188 | MOL002714 | baicalein | Proto-oncogene c-Fos | FOS |
| 189 | MOL002714 | baicalein | Caspase-3 | CASP3 |
| 190 | MOL002714 | baicalein | Cellular tumor antigen p53 | TP63 |
| 191 | MOL002714 | baicalein | Hypoxia-inducible factor 1-alpha | HIF1A |
| 192 | MOL002714 | baicalein | Fos-related antigen 1 | FOSL1 |
| 193 | MOL002714 | baicalein | G2/mitotic-specific cyclin-B1 | CCNB1 |
| 194 | MOL002714 | baicalein | Aryl hydrocarbon receptor | AHR |
| 195 | MOL002714 | baicalein | Insulin-like growth factor II | IGF2 |
| 196 | MOL002714 | baicalein | Cytochrome c | CYCS |
| 197 | MOL002714 | baicalein | NADPH oxidase 5 | NOX5 |
| 198 | MOL002714 | baicalein | Apolipoprotein D | APOD |
| 199 | MOL000358 | beta-sitosterol | Progesterone receptor | PGR |
| 200 | MOL000358 | beta-sitosterol | Nuclear receptor coactivator 2 | NCOA2 |
| 201 | MOL000358 | beta-sitosterol | Prostaglandin G/H synthase 1 | PTGS1 |
| 202 | MOL000358 | beta-sitosterol | Muscarinic acetylcholine receptor M3 | CHRM3 |
| 203 | MOL000358 | beta-sitosterol | Muscarinic acetylcholine receptor M1 | CHRM1 |
| 204 | MOL000358 | beta-sitosterol | Muscarinic acetylcholine receptor M4 | CHRM4 |
| 205 | MOL000358 | beta-sitosterol | Alpha-1A adrenergic receptor | ADRA1A |
| 206 | MOL000358 | beta-sitosterol | Muscarinic acetylcholine receptor M2 | CHRM2 |
| 207 | MOL000358 | beta-sitosterol | Neuronal acetylcholine receptor subunit alpha-2 | CHRNA2 |
| 208 | MOL000358 | beta-sitosterol | Gamma-aminobutyric acid receptor subunit alpha-1 | GABRA1 |
| 209 | MOL000358 | beta-sitosterol | Apoptosis regulator Bcl-2 | BCL2 |
| 210 | MOL000358 | beta-sitosterol | Caspase-9 | CASP9 |
| 211 | MOL000358 | beta-sitosterol | Caspase-3 | CASP3 |
| 212 | MOL000358 | beta-sitosterol | Caspase-8 | CASP8 |
| 213 | MOL000358 | beta-sitosterol | Protein kinase C alpha type | PRKCA |
| 214 | MOL000358 | beta-sitosterol | Serum paraoxonase/arylesterase 1 | PON1 |
| 215 | MOL000359 | sitosterol | Progesterone receptor | PGR |
| 216 | MOL000359 | sitosterol | Nuclear receptor coactivator 2 | NCOA2 |
| 217 | MOL000359 | sitosterol | Mineralocorticoid receptor | NR3C2 |
| 218 | MOL004355 | Spinasterol | Progesterone receptor | PGR |
| 219 | MOL004355 | Spinasterol | Mineralocorticoid receptor | NR3C2 |
| 220 | MOL004355 | Spinasterol | Nuclear receptor coactivator 2 | NCOA2 |
| 221 | MOL000449 | Stigmasterol | Progesterone receptor | PGR |
| 222 | MOL000449 | Stigmasterol | Mineralocorticoid receptor | NR3C2 |
| 223 | MOL000449 | Stigmasterol | Nuclear receptor coactivator 2 | NCOA2 |
| 224 | MOL000449 | Stigmasterol | Nuclear receptor coactivator 1 | NCOA1 |
| 225 | MOL000449 | Stigmasterol | Prostaglandin G/H synthase 1 | PTGS1 |
| 226 | MOL000449 | Stigmasterol | Aldose reductase | AKR1B1 |
| 227 | MOL000449 | Stigmasterol | Urokinase-type plasminogen activator | PLAU |
| 228 | MOL000449 | Stigmasterol | Chymotrypsinogen B | CTRB1 |
| 229 | MOL000449 | Stigmasterol | Muscarinic acetylcholine receptor M3 | CHRM3 |
| 230 | MOL000449 | Stigmasterol | Muscarinic acetylcholine receptor M1 | CHRM1 |
| 231 | MOL000449 | Stigmasterol | Alpha-1A adrenergic receptor | ADRA1A |
| 232 | MOL000449 | Stigmasterol | Muscarinic acetylcholine receptor M2 | CHRM2 |
| 233 | MOL000449 | Stigmasterol | Gamma-aminobutyric acid receptor subunit alpha-1 | GABRA1 |
| 234 | MOL000492 | (+)-catechin | Prostaglandin G/H synthase 1 | PTGS1 |
| 235 | MOL000492 | (+)-catechin | Estrogen receptor | ESR1 |
| 236 | MOL000492 | (+)-catechin | Nuclear receptor coactivator 2 | NCOA2 |
| 237 | MOL006992 | (2R,3R)-4-methoxyl-distylin | Prostaglandin G/H synthase 1 | PTGS1 |
| 238 | MOL006992 | (2R,3R)-4-methoxyl-distylin | Estrogen receptor | ESR1 |
| 239 | MOL006999 | stigmast-7-en-3-ol | Progesterone receptor | PGR |
| 240 | MOL002883 | Ethyl oleate (NF) | Nuclear receptor coactivator 2 | NCOA2 |
| 241 | MOL005043 | campest-5-en-3beta-ol | Progesterone receptor | PGR |
| 242 | MOL001494 | Mandenol | Prostaglandin G/H synthase 1 | PTGS1 |
| 243 | MOL001494 | Mandenol | Nuclear receptor coactivator 2 | NCOA2 |
| 244 | MOL002135 | Myricanone | Prostaglandin G/H synthase 1 | PTGS1 |
| 245 | MOL002135 | Myricanone | Estrogen receptor | ESR1 |
| 246 | MOL002135 | Myricanone | Androgen receptor | AR |
| 247 | MOL002135 | Myricanone | Peroxisome proliferator activated receptor gamma | PPARG |
| 248 | MOL002135 | Myricanone | Coagulation factor VII | F7 |
| 249 | MOL002135 | Myricanone | Estrogen receptor beta | ESR2 |
| 250 | MOL002135 | Myricanone | Glycogen synthase kinase-3 beta | GSK3B |
| 251 | MOL002135 | Myricanone | Serine/threonine-protein kinase Chk1 | CHEK1 |
| 252 | MOL002135 | Myricanone | Nuclear receptor coactivator 1 | NCOA1 |
| 253 | MOL002157 | wallichilide | Mineralocorticoid receptor | NR3C2 |
| 254 | MOL002157 | wallichilide | Glucocorticoid receptor | NR3C1 |
| 255 | MOL002157 | wallichilide | Nuclear receptor coactivator 2 | NCOA2 |
| 256 | MOL000359 | sitosterol | Progesterone receptor | PGR |
| 257 | MOL000359 | sitosterol | Nuclear receptor coactivator 2 | NCOA2 |
| 258 | MOL000359 | sitosterol | Mineralocorticoid receptor | NR3C2 |
| 259 | MOL000433 | FA | Glycogen synthase kinase-3 beta | GSK3B |
| 260 | MOL000358 | beta-sitosterol | Progesterone receptor | PGR |
| 261 | MOL000358 | beta-sitosterol | Nuclear receptor coactivator 2 | NCOA2 |
| 262 | MOL000358 | beta-sitosterol | Prostaglandin G/H synthase 1 | PTGS1 |
| 263 | MOL000358 | beta-sitosterol | Muscarinic acetylcholine receptor M3 | CHRM3 |
| 264 | MOL000358 | beta-sitosterol | Muscarinic acetylcholine receptor M1 | CHRM1 |
| 265 | MOL000358 | beta-sitosterol | Muscarinic acetylcholine receptor M4 | CHRM4 |
| 266 | MOL000358 | beta-sitosterol | Alpha-1A adrenergic receptor | ADRA1A |
| 267 | MOL000358 | beta-sitosterol | Muscarinic acetylcholine receptor M2 | CHRM2 |
| 268 | MOL000358 | beta-sitosterol | Neuronal acetylcholine receptor subunit alpha-2 | CHRNA2 |
| 269 | MOL000358 | beta-sitosterol | Gamma-aminobutyric acid receptor subunit alpha-1 | GABRA1 |
| 270 | MOL000358 | beta-sitosterol | Apoptosis regulator Bcl-2 | BCL2 |
| 271 | MOL000358 | beta-sitosterol | Caspase-9 | CASP9 |
| 272 | MOL000358 | beta-sitosterol | Caspase-3 | CASP3 |
| 273 | MOL000358 | beta-sitosterol | Caspase-8 | CASP8 |
| 274 | MOL000358 | beta-sitosterol | Protein kinase C alpha type | PRKCA |
| 275 | MOL000358 | beta-sitosterol | Serum paraoxonase/arylesterase 1 | PON1 |
| 276 | MOL000449 | Stigmasterol | Progesterone receptor | PGR |
| 277 | MOL000449 | Stigmasterol | Mineralocorticoid receptor | NR3C2 |
| 278 | MOL000449 | Stigmasterol | Nuclear receptor coactivator 2 | NCOA2 |
| 279 | MOL000449 | Stigmasterol | Nuclear receptor coactivator 1 | NCOA1 |
| 280 | MOL000449 | Stigmasterol | Prostaglandin G/H synthase 1 | PTGS1 |
| 281 | MOL000449 | Stigmasterol | Aldose reductase | AKR1B1 |
| 282 | MOL000449 | Stigmasterol | Urokinase-type plasminogen activator | PLAU |
| 283 | MOL000449 | Stigmasterol | Chymotrypsinogen B | CTRB1 |
| 284 | MOL000449 | Stigmasterol | Muscarinic acetylcholine receptor M3 | CHRM3 |
| 285 | MOL000449 | Stigmasterol | Muscarinic acetylcholine receptor M1 | CHRM1 |
| 286 | MOL000449 | Stigmasterol | Alpha-1A adrenergic receptor | ADRA1A |
| 287 | MOL000449 | Stigmasterol | Muscarinic acetylcholine receptor M2 | CHRM2 |
| 288 | MOL000449 | Stigmasterol | Gamma-aminobutyric acid receptor subunit alpha-1 | GABRA1 |
| 289 | MOL001484 | Inermine | Prostaglandin G/H synthase 1 | PTGS1 |
| 290 | MOL001484 | Inermine | Muscarinic acetylcholine receptor M3 | CHRM3 |
| 291 | MOL001484 | Inermine | 5-hydroxytryptamine receptor 3A | HTR3A |
| 292 | MOL001484 | Inermine | Trypsin-1 | PRSS1 |
| 293 | MOL001484 | Inermine | Muscarinic acetylcholine receptor M1 | CHRM1 |
| 294 | MOL001792 | DFV | Prostaglandin G/H synthase 1 | PTGS1 |
| 295 | MOL001792 | DFV | Estrogen receptor | ESR1 |
| 296 | MOL000211 | Mairin | Progesterone receptor | PGR |
| 297 | MOL002311 | Glycyrol | Estrogen receptor | ESR1 |
| 298 | MOL002311 | Glycyrol | Peroxisome proliferator activated receptor gamma | PPARG |
| 299 | MOL002311 | Glycyrol | Glycogen synthase kinase-3 beta | GSK3B |
| 300 | MOL002311 | Glycyrol | Serine/threonine-protein kinase Chk1 | CHEK1 |
| 301 | MOL000239 | Jaranol | Prostaglandin G/H synthase 1 | PTGS1 |
| 302 | MOL000239 | Jaranol | Androgen receptor | AR |
| 303 | MOL000239 | Jaranol | Estrogen receptor beta | ESR2 |
| 304 | MOL000239 | Jaranol | Serine/threonine-protein kinase Chk1 | CHEK1 |
| 305 | MOL000239 | Jaranol | Trypsin-1 | PRSS1 |
| 306 | MOL000239 | Jaranol | Nuclear receptor coactivator 2 | NCOA2 |
| 307 | MOL002565 | Medicarpin | Prostaglandin G/H synthase 1 | PTGS1 |
| 308 | MOL002565 | Medicarpin | Muscarinic acetylcholine receptor M3 | CHRM3 |
| 309 | MOL002565 | Medicarpin | Muscarinic acetylcholine receptor M1 | CHRM1 |
| 310 | MOL002565 | Medicarpin | Estrogen receptor | ESR1 |
| 311 | MOL002565 | Medicarpin | Muscarinic acetylcholine receptor M5 | CHRM5 |
| 312 | MOL002565 | Medicarpin | Muscarinic acetylcholine receptor M4 | CHRM4 |
| 313 | MOL002565 | Medicarpin | Alpha-1A adrenergic receptor | ADRA1A |
| 314 | MOL002565 | Medicarpin | Muscarinic acetylcholine receptor M2 | CHRM2 |
| 315 | MOL002565 | Medicarpin | Estrogen receptor beta | ESR2 |
| 316 | MOL002565 | Medicarpin | Mitogen-activated protein kinase 10 | MAPK10 |
| 317 | MOL002565 | Medicarpin | Trypsin-1 | PRSS1 |
| 318 | MOL000354 | isorhamnetin | Prostaglandin G/H synthase 1 | PTGS1 |
| 319 | MOL000354 | isorhamnetin | Estrogen receptor | ESR1 |
| 320 | MOL000354 | isorhamnetin | Androgen receptor | AR |
| 321 | MOL000354 | isorhamnetin | Peroxisome proliferator activated receptor gamma | PPARG |
| 322 | MOL000354 | isorhamnetin | Estrogen receptor beta | ESR2 |
| 323 | MOL000354 | isorhamnetin | Glycogen synthase kinase-3 beta | GSK3B |
| 324 | MOL000354 | isorhamnetin | Trypsin-1 | PRSS1 |
| 325 | MOL000354 | isorhamnetin | Nuclear receptor coactivator 2 | NCOA2 |
| 326 | MOL000354 | isorhamnetin | Serine/threonine-protein kinase Chk1 | CHEK1 |
| 327 | MOL000354 | isorhamnetin | Aldose reductase | AKR1B1 |
| 328 | MOL000354 | isorhamnetin | Nuclear receptor coactivator 1 | NCOA1 |
| 329 | MOL000354 | isorhamnetin | Coagulation factor VII | F7 |
| 330 | MOL000354 | isorhamnetin | Acetylcholinesterase | ACHE |
| 331 | MOL000354 | isorhamnetin | Gamma-aminobutyric acid receptor subunit alpha-1 | GABRA1 |
| 332 | MOL000354 | isorhamnetin | Glutamate receptor 2 | GRIA2 |
| 333 | MOL000354 | isorhamnetin | Transcription factor p65 | RELA |
| 334 | MOL000354 | isorhamnetin | Oxidized low-density lipoprotein receptor 1 | OLR1 |
| 335 | MOL000359 | sitosterol | Progesterone receptor | PGR |
| 336 | MOL000359 | sitosterol | Nuclear receptor coactivator 2 | NCOA2 |
| 337 | MOL000359 | sitosterol | Mineralocorticoid receptor | NR3C2 |
| 338 | MOL003656 | Lupiwighteone | Estrogen receptor | ESR1 |
| 339 | MOL003656 | Lupiwighteone | Androgen receptor | AR |
| 340 | MOL003656 | Lupiwighteone | Peroxisome proliferator activated receptor gamma | PPARG |
| 341 | MOL003656 | Lupiwighteone | Estrogen receptor beta | ESR2 |
| 342 | MOL003656 | Lupiwighteone | Glycogen synthase kinase-3 beta | GSK3B |
| 343 | MOL003656 | Lupiwighteone | Serine/threonine-protein kinase Chk1 | CHEK1 |
| 344 | MOL003656 | Lupiwighteone | Trypsin-1 | PRSS1 |
| 345 | MOL003656 | Lupiwighteone | Nuclear receptor coactivator 2 | NCOA2 |
| 346 | MOL003896 | 7-Methoxy-2-methyl isoflavone | Prostaglandin G/H synthase 1 | PTGS1 |
| 347 | MOL003896 | 7-Methoxy-2-methyl isoflavone | Muscarinic acetylcholine receptor M3 | CHRM3 |
| 348 | MOL003896 | 7-Methoxy-2-methyl isoflavone | Muscarinic acetylcholine receptor M1 | CHRM1 |
| 349 | MOL003896 | 7-Methoxy-2-methyl isoflavone | Estrogen receptor | ESR1 |
| 350 | MOL003896 | 7-Methoxy-2-methyl isoflavone | Androgen receptor | AR |
| 351 | MOL003896 | 7-Methoxy-2-methyl isoflavone | Peroxisome proliferator activated receptor gamma | PPARG |
| 352 | MOL003896 | 7-Methoxy-2-methyl isoflavone | Acetylcholinesterase | ACHE |
| 353 | MOL003896 | 7-Methoxy-2-methyl isoflavone | Estrogen receptor beta | ESR2 |
| 354 | MOL003896 | 7-Methoxy-2-methyl isoflavone | Gamma-aminobutyric acid receptor subunit alpha-1 | GABRA1 |
| 355 | MOL003896 | 7-Methoxy-2-methyl isoflavone | Glycogen synthase kinase-3 beta | GSK3B |
| 356 | MOL003896 | 7-Methoxy-2-methyl isoflavone | Serine/threonine-protein kinase Chk1 | CHEK1 |
| 357 | MOL003896 | 7-Methoxy-2-methyl isoflavone | Trypsin-1 | PRSS1 |
| 358 | MOL003896 | 7-Methoxy-2-methyl isoflavone | Nuclear receptor coactivator 1 | NCOA1 |
| 359 | MOL003896 | 7-Methoxy-2-methyl isoflavone | Muscarinic acetylcholine receptor M5 | CHRM5 |
| 360 | MOL003896 | 7-Methoxy-2-methyl isoflavone | Nuclear receptor coactivator 2 | NCOA2 |
| 361 | MOL000392 | formononetin | Prostaglandin G/H synthase 1 | PTGS1 |
| 362 | MOL000392 | formononetin | Muscarinic acetylcholine receptor M1 | CHRM1 |
| 363 | MOL000392 | formononetin | Estrogen receptor | ESR1 |
| 364 | MOL000392 | formononetin | Androgen receptor | AR |
| 365 | MOL000392 | formononetin | Peroxisome proliferator activated receptor gamma | PPARG |
| 366 | MOL000392 | formononetin | Alpha-1A adrenergic receptor | ADRA1A |
| 367 | MOL000392 | formononetin | Estrogen receptor beta | ESR2 |
| 368 | MOL000392 | formononetin | Glycogen synthase kinase-3 beta | GSK3B |
| 369 | MOL000392 | formononetin | Serine/threonine-protein kinase Chk1 | CHEK1 |
| 370 | MOL000392 | formononetin | Trypsin-1 | PRSS1 |
| 371 | MOL000392 | formononetin | Acetylcholinesterase | ACHE |
| 372 | MOL000392 | formononetin | Peroxisome proliferator-activated receptor gamma | PPARG |
| 373 | MOL000417 | Calycosin | Prostaglandin G/H synthase 1 | PTGS1 |
| 374 | MOL000417 | Calycosin | Estrogen receptor | ESR1 |
| 375 | MOL000417 | Calycosin | Androgen receptor | AR |
| 376 | MOL000417 | Calycosin | Peroxisome proliferator activated receptor gamma | PPARG |
| 377 | MOL000417 | Calycosin | Estrogen receptor beta | ESR2 |
| 378 | MOL000417 | Calycosin | Glycogen synthase kinase-3 beta | GSK3B |
| 379 | MOL000417 | Calycosin | Serine/threonine-protein kinase Chk1 | CHEK1 |
| 380 | MOL000417 | Calycosin | Trypsin-1 | PRSS1 |
| 381 | MOL000417 | Calycosin | Nuclear receptor coactivator 2 | NCOA2 |
| 382 | MOL000422 | kaempferol | Prostaglandin G/H synthase 1 | PTGS1 |
| 383 | MOL000422 | kaempferol | Androgen receptor | AR |
| 384 | MOL000422 | kaempferol | Peroxisome proliferator activated receptor gamma | PPARG |
| 385 | MOL000422 | kaempferol | Nuclear receptor coactivator 2 | NCOA2 |
| 386 | MOL000422 | kaempferol | Trypsin-1 | PRSS1 |
| 387 | MOL000422 | kaempferol | Progesterone receptor | PGR |
| 388 | MOL000422 | kaempferol | Muscarinic acetylcholine receptor M1 | CHRM1 |
| 389 | MOL000422 | kaempferol | Acetylcholinesterase | ACHE |
| 390 | MOL000422 | kaempferol | Muscarinic acetylcholine receptor M2 | CHRM2 |
| 391 | MOL000422 | kaempferol | Gamma-aminobutyric acid receptor subunit alpha-1 | GABRA1 |
| 392 | MOL000422 | kaempferol | Coagulation factor VII | F7 |
| 393 | MOL000422 | kaempferol | Transcription factor p65 | RELA |
| 394 | MOL000422 | kaempferol | Inhibitor of nuclear factor kappa-B kinase subunit beta | IKBKB |
| 395 | MOL000422 | kaempferol | Apoptosis regulator Bcl-2 | BCL2 |
| 396 | MOL000422 | kaempferol | Activator of 90 kDa heat shock protein ATPase homolog 1 | AHSA1 |
| 397 | MOL000422 | kaempferol | Caspase-3 | CASP3 |
| 398 | MOL000422 | kaempferol | Mitogen-activated protein kinase 8 | MAPK8 |
| 399 | MOL000422 | kaempferol | Peroxisome proliferator-activated receptor gamma | PPARG |
| 400 | MOL000422 | kaempferol | Cytochrome P450 3A4 | CYP3A4 |
| 401 | MOL000422 | kaempferol | Cytochrome P450 1A1 | CYP1A1 |
| 402 | MOL000422 | kaempferol | Intercellular adhesion molecule 1 | ICAM1 |
| 403 | MOL000422 | kaempferol | E-selectin | SELE |
| 404 | MOL000422 | kaempferol | Vascular cell adhesion protein 1 | VCAM1 |
| 405 | MOL000422 | kaempferol | Cytochrome P450 1B1 | CYP1B1 |
| 406 | MOL000422 | kaempferol | Arachidonate 5-lipoxygenase | ALOX5 |
| 407 | MOL000422 | kaempferol | Glutathione S-transferase P | GSTP1 |
| 408 | MOL000422 | kaempferol | Aryl hydrocarbon receptor | AHR |
| 409 | MOL000422 | kaempferol | 26S proteasome non-ATPase regulatory subunit 3 | PSMD3 |
| 410 | MOL000422 | kaempferol | Solute carrier family 2, facilitated glucose transporter member 4 | SLC2A4 |
| 411 | MOL000422 | kaempferol | Nuclear receptor subfamily 1 group I member 3 | NR1I3 |
| 412 | MOL000422 | kaempferol | Type I iodothyronine deiodinase | DIO1 |
| 413 | MOL000422 | kaempferol | Glutathione S-transferase Mu 1 | GSTM1 |
| 414 | MOL000422 | kaempferol | Glutathione S-transferase Mu 2 | GSTM2 |
| 415 | MOL000422 | kaempferol | Aldo-keto reductase family 1 member C3 | AKR1C3 |
| 416 | MOL004328 | naringenin | Prostaglandin G/H synthase 1 | PTGS1 |
| 417 | MOL004328 | naringenin | Estrogen receptor | ESR1 |
| 418 | MOL004328 | naringenin | Transcription factor p65 | RELA |
| 419 | MOL004328 | naringenin | Apoptosis regulator Bcl-2 | BCL2 |
| 420 | MOL004328 | naringenin | Caspase-3 | CASP3 |
| 421 | MOL004328 | naringenin | Fatty acid synthase | FASN |
| 422 | MOL004328 | naringenin | Low-density lipoprotein receptor | LDLR |
| 423 | MOL004328 | naringenin | Peroxisome proliferator-activated receptor gamma | PPARG |
| 424 | MOL004328 | naringenin | Microsomal triglyceride transfer protein large subunit | MTTP |
| 425 | MOL004328 | naringenin | Apolipoprotein B-100 | APOB |
| 426 | MOL004328 | naringenin | Glutathione S-transferase P | GSTP1 |
| 427 | MOL004328 | naringenin | Sterol regulatory element-binding protein 1 | SREBF1 |
| 428 | MOL004328 | naringenin | Multidrug resistance-associated protein 1 | ABCC1 |
| 429 | MOL004328 | naringenin | Aldo-keto reductase family 1 member C1 | AKR1C1 |
| 430 | MOL004328 | naringenin | 4-aminobutyrate aminotransferase, mitochondrial | ABAT |
| 431 | MOL004805 | (2S)-2-[4-hydroxy-3-(3-methylbut-2-enyl)phenyl]-8,8-dimethyl-2,3-dihydropyrano[2,3-f]chromen-4-one | Estrogen receptor | ESR1 |
| 432 | MOL004805 | (2S)-2-[4-hydroxy-3-(3-methylbut-2-enyl)phenyl]-8,8-dimethyl-2,3-dihydropyrano[2,3-f]chromen-4-one | Androgen receptor | AR |
| 433 | MOL004805 | (2S)-2-[4-hydroxy-3-(3-methylbut-2-enyl)phenyl]-8,8-dimethyl-2,3-dihydropyrano[2,3-f]chromen-4-one | Peroxisome proliferator activated receptor gamma | PPARG |
| 434 | MOL004805 | (2S)-2-[4-hydroxy-3-(3-methylbut-2-enyl)phenyl]-8,8-dimethyl-2,3-dihydropyrano[2,3-f]chromen-4-one | Estrogen receptor beta | ESR2 |
| 435 | MOL004805 | (2S)-2-[4-hydroxy-3-(3-methylbut-2-enyl)phenyl]-8,8-dimethyl-2,3-dihydropyrano[2,3-f]chromen-4-one | Glycogen synthase kinase-3 beta | GSK3B |
| 436 | MOL004806 | euchrenone | Estrogen receptor | ESR1 |
| 437 | MOL004806 | euchrenone | Estrogen receptor beta | ESR2 |
| 438 | MOL004808 | glyasperin B | Estrogen receptor | ESR1 |
| 439 | MOL004808 | glyasperin B | Androgen receptor | AR |
| 440 | MOL004808 | glyasperin B | Peroxisome proliferator activated receptor gamma | PPARG |
| 441 | MOL004808 | glyasperin B | Coagulation factor VII | F7 |
| 442 | MOL004808 | glyasperin B | Acetylcholinesterase | ACHE |
| 443 | MOL004808 | glyasperin B | Estrogen receptor beta | ESR2 |
| 444 | MOL004808 | glyasperin B | Glycogen synthase kinase-3 beta | GSK3B |
| 445 | MOL004808 | glyasperin B | Trypsin-1 | PRSS1 |
| 446 | MOL004808 | glyasperin B | Nuclear receptor coactivator 2 | NCOA2 |
| 447 | MOL004810 | glyasperin F | Prostaglandin G/H synthase 1 | PTGS1 |
| 448 | MOL004810 | glyasperin F | Estrogen receptor | ESR1 |
| 449 | MOL004810 | glyasperin F | Androgen receptor | AR |
| 450 | MOL004810 | glyasperin F | Peroxisome proliferator activated receptor gamma | PPARG |
| 451 | MOL004810 | glyasperin F | Estrogen receptor beta | ESR2 |
| 452 | MOL004810 | glyasperin F | Glycogen synthase kinase-3 beta | GSK3B |
| 453 | MOL004810 | glyasperin F | Trypsin-1 | PRSS1 |
| 454 | MOL004811 | Glyasperin C | Estrogen receptor | ESR1 |
| 455 | MOL004811 | Glyasperin C | Androgen receptor | AR |
| 456 | MOL004811 | Glyasperin C | Peroxisome proliferator activated receptor gamma | PPARG |
| 457 | MOL004811 | Glyasperin C | Acetylcholinesterase | ACHE |
| 458 | MOL004811 | Glyasperin C | Estrogen receptor beta | ESR2 |
| 459 | MOL004811 | Glyasperin C | Glycogen synthase kinase-3 beta | GSK3B |
| 460 | MOL004811 | Glyasperin C | Serine/threonine-protein kinase Chk1 | CHEK1 |
| 461 | MOL004811 | Glyasperin C | Trypsin-1 | PRSS1 |
| 462 | MOL004811 | Glyasperin C | Nuclear receptor coactivator 2 | NCOA2 |
| 463 | MOL004814 | Isotrifoliol | Estrogen receptor | ESR1 |
| 464 | MOL004814 | Isotrifoliol | Androgen receptor | AR |
| 465 | MOL004814 | Isotrifoliol | Estrogen receptor beta | ESR2 |
| 466 | MOL004814 | Isotrifoliol | Glycogen synthase kinase-3 beta | GSK3B |
| 467 | MOL004814 | Isotrifoliol | Serine/threonine-protein kinase Chk1 | CHEK1 |
| 468 | MOL004815 | (E)-1-(2,4-dihydroxyphenyl)-3-(2,2-dimethylchromen-6-yl)prop-2-en-1-one | Prostaglandin G/H synthase 1 | PTGS1 |
| 469 | MOL004815 | (E)-1-(2,4-dihydroxyphenyl)-3-(2,2-dimethylchromen-6-yl)prop-2-en-1-one | Estrogen receptor | ESR1 |
| 470 | MOL004815 | (E)-1-(2,4-dihydroxyphenyl)-3-(2,2-dimethylchromen-6-yl)prop-2-en-1-one | Androgen receptor | AR |
| 471 | MOL004815 | (E)-1-(2,4-dihydroxyphenyl)-3-(2,2-dimethylchromen-6-yl)prop-2-en-1-one | Peroxisome proliferator activated receptor gamma | PPARG |
| 472 | MOL004815 | (E)-1-(2,4-dihydroxyphenyl)-3-(2,2-dimethylchromen-6-yl)prop-2-en-1-one | Estrogen receptor beta | ESR2 |
| 473 | MOL004815 | (E)-1-(2,4-dihydroxyphenyl)-3-(2,2-dimethylchromen-6-yl)prop-2-en-1-one | Glycogen synthase kinase-3 beta | GSK3B |
| 474 | MOL004815 | (E)-1-(2,4-dihydroxyphenyl)-3-(2,2-dimethylchromen-6-yl)prop-2-en-1-one | Serine/threonine-protein kinase Chk1 | CHEK1 |
| 475 | MOL004815 | (E)-1-(2,4-dihydroxyphenyl)-3-(2,2-dimethylchromen-6-yl)prop-2-en-1-one | Nuclear receptor coactivator 2 | NCOA2 |
| 476 | MOL004820 | kanzonols W | Prostaglandin G/H synthase 1 | PTGS1 |
| 477 | MOL004820 | kanzonols W | Estrogen receptor | ESR1 |
| 478 | MOL004820 | kanzonols W | Androgen receptor | AR |
| 479 | MOL004820 | kanzonols W | Peroxisome proliferator activated receptor gamma | PPARG |
| 480 | MOL004820 | kanzonols W | Estrogen receptor beta | ESR2 |
| 481 | MOL004820 | kanzonols W | Glycogen synthase kinase-3 beta | GSK3B |
| 482 | MOL004820 | kanzonols W | Serine/threonine-protein kinase Chk1 | CHEK1 |
| 483 | MOL004820 | kanzonols W | Trypsin-1 | PRSS1 |
| 484 | MOL004820 | kanzonols W | Nuclear receptor coactivator 2 | NCOA2 |
| 485 | MOL004820 | kanzonols W | Nuclear receptor coactivator 1 | NCOA1 |
| 486 | MOL004824 | (2S)-6-(2,4-dihydroxyphenyl)-2-(2-hydroxypropan-2-yl)-4-methoxy-2,3-dihydrofuro[3,2-g]chromen-7-one | Estrogen receptor | ESR1 |
| 487 | MOL004824 | (2S)-6-(2,4-dihydroxyphenyl)-2-(2-hydroxypropan-2-yl)-4-methoxy-2,3-dihydrofuro[3,2-g]chromen-7-one | Androgen receptor | AR |
| 488 | MOL004824 | (2S)-6-(2,4-dihydroxyphenyl)-2-(2-hydroxypropan-2-yl)-4-methoxy-2,3-dihydrofuro[3,2-g]chromen-7-one | Peroxisome proliferator activated receptor gamma | PPARG |
| 489 | MOL004824 | (2S)-6-(2,4-dihydroxyphenyl)-2-(2-hydroxypropan-2-yl)-4-methoxy-2,3-dihydrofuro[3,2-g]chromen-7-one | Coagulation factor VII | F7 |
| 490 | MOL004824 | (2S)-6-(2,4-dihydroxyphenyl)-2-(2-hydroxypropan-2-yl)-4-methoxy-2,3-dihydrofuro[3,2-g]chromen-7-one | Acetylcholinesterase | ACHE |
| 491 | MOL004824 | (2S)-6-(2,4-dihydroxyphenyl)-2-(2-hydroxypropan-2-yl)-4-methoxy-2,3-dihydrofuro[3,2-g]chromen-7-one | Estrogen receptor beta | ESR2 |
| 492 | MOL004824 | (2S)-6-(2,4-dihydroxyphenyl)-2-(2-hydroxypropan-2-yl)-4-methoxy-2,3-dihydrofuro[3,2-g]chromen-7-one | Glycogen synthase kinase-3 beta | GSK3B |
| 493 | MOL004824 | (2S)-6-(2,4-dihydroxyphenyl)-2-(2-hydroxypropan-2-yl)-4-methoxy-2,3-dihydrofuro[3,2-g]chromen-7-one | Serine/threonine-protein kinase Chk1 | CHEK1 |
| 494 | MOL004824 | (2S)-6-(2,4-dihydroxyphenyl)-2-(2-hydroxypropan-2-yl)-4-methoxy-2,3-dihydrofuro[3,2-g]chromen-7-one | Trypsin-1 | PRSS1 |
| 495 | MOL004827 | Semilicoisoflavone B | Estrogen receptor | ESR1 |
| 496 | MOL004827 | Semilicoisoflavone B | Androgen receptor | AR |
| 497 | MOL004827 | Semilicoisoflavone B | Peroxisome proliferator activated receptor gamma | PPARG |
| 498 | MOL004827 | Semilicoisoflavone B | Coagulation factor VII | F7 |
| 499 | MOL004827 | Semilicoisoflavone B | Acetylcholinesterase | ACHE |
| 500 | MOL004827 | Semilicoisoflavone B | Glycogen synthase kinase-3 beta | GSK3B |
| 501 | MOL004827 | Semilicoisoflavone B | Serine/threonine-protein kinase Chk1 | CHEK1 |
| 502 | MOL004827 | Semilicoisoflavone B | Trypsin-1 | PRSS1 |
| 503 | MOL004828 | Glepidotin A | Prostaglandin G/H synthase 1 | PTGS1 |
| 504 | MOL004828 | Glepidotin A | Estrogen receptor | ESR1 |
| 505 | MOL004828 | Glepidotin A | Androgen receptor | AR |
| 506 | MOL004828 | Glepidotin A | Peroxisome proliferator activated receptor gamma | PPARG |
| 507 | MOL004828 | Glepidotin A | Coagulation factor VII | F7 |
| 508 | MOL004828 | Glepidotin A | Glycogen synthase kinase-3 beta | GSK3B |
| 509 | MOL004828 | Glepidotin A | Serine/threonine-protein kinase Chk1 | CHEK1 |
| 510 | MOL004828 | Glepidotin A | Trypsin-1 | PRSS1 |
| 511 | MOL004829 | Glepidotin B | Prostaglandin G/H synthase 1 | PTGS1 |
| 512 | MOL004829 | Glepidotin B | Estrogen receptor | ESR1 |
| 513 | MOL004829 | Glepidotin B | Coagulation factor VII | F7 |
| 514 | MOL004829 | Glepidotin B | Nuclear receptor coactivator 1 | NCOA1 |
| 515 | MOL004833 | Phaseolinisoflavan | Muscarinic acetylcholine receptor M1 | CHRM1 |
| 516 | MOL004833 | Phaseolinisoflavan | Estrogen receptor | ESR1 |
| 517 | MOL004833 | Phaseolinisoflavan | Androgen receptor | AR |
| 518 | MOL004833 | Phaseolinisoflavan | Peroxisome proliferator activated receptor gamma | PPARG |
| 519 | MOL004833 | Phaseolinisoflavan | Acetylcholinesterase | ACHE |
| 520 | MOL004833 | Phaseolinisoflavan | Estrogen receptor beta | ESR2 |
| 521 | MOL004833 | Phaseolinisoflavan | Glycogen synthase kinase-3 beta | GSK3B |
| 522 | MOL004833 | Phaseolinisoflavan | Serine/threonine-protein kinase Chk1 | CHEK1 |
| 523 | MOL004833 | Phaseolinisoflavan | Trypsin-1 | PRSS1 |
| 524 | MOL004833 | Phaseolinisoflavan | Nuclear receptor coactivator 1 | NCOA1 |
| 525 | MOL004835 | Glypallichalcone | Prostaglandin G/H synthase 1 | PTGS1 |
| 526 | MOL004835 | Glypallichalcone | Muscarinic acetylcholine receptor M1 | CHRM1 |
| 527 | MOL004835 | Glypallichalcone | Estrogen receptor | ESR1 |
| 528 | MOL004835 | Glypallichalcone | Androgen receptor | AR |
| 529 | MOL004835 | Glypallichalcone | Peroxisome proliferator activated receptor gamma | PPARG |
| 530 | MOL004835 | Glypallichalcone | Estrogen receptor beta | ESR2 |
| 531 | MOL004835 | Glypallichalcone | Glycogen synthase kinase-3 beta | GSK3B |
| 532 | MOL004835 | Glypallichalcone | Serine/threonine-protein kinase Chk1 | CHEK1 |
| 533 | MOL004835 | Glypallichalcone | Nuclear receptor coactivator 1 | NCOA1 |
| 534 | MOL004838 | 8-(6-hydroxy-2-benzofuranyl)-2,2-dimethyl-5-chromenol | Estrogen receptor | ESR1 |
| 535 | MOL004841 | Licochalcone B | Prostaglandin G/H synthase 1 | PTGS1 |
| 536 | MOL004841 | Licochalcone B | Estrogen receptor | ESR1 |
| 537 | MOL004841 | Licochalcone B | Androgen receptor | AR |
| 538 | MOL004841 | Licochalcone B | Peroxisome proliferator activated receptor gamma | PPARG |
| 539 | MOL004841 | Licochalcone B | Estrogen receptor beta | ESR2 |
| 540 | MOL004841 | Licochalcone B | Glycogen synthase kinase-3 beta | GSK3B |
| 541 | MOL004841 | Licochalcone B | Serine/threonine-protein kinase Chk1 | CHEK1 |
| 542 | MOL004848 | licochalcone G | Estrogen receptor | ESR1 |
| 543 | MOL004848 | licochalcone G | Androgen receptor | AR |
| 544 | MOL004848 | licochalcone G | Peroxisome proliferator activated receptor gamma | PPARG |
| 545 | MOL004848 | licochalcone G | Estrogen receptor beta | ESR2 |
| 546 | MOL004848 | licochalcone G | Glycogen synthase kinase-3 beta | GSK3B |
| 547 | MOL004848 | licochalcone G | Nuclear receptor coactivator 2 | NCOA2 |
| 548 | MOL004849 | 3-(2,4-dihydroxyphenyl)-8-(1,1-dimethylprop-2-enyl)-7-hydroxy-5-methoxy-coumarin | Estrogen receptor | ESR1 |
| 549 | MOL004849 | 3-(2,4-dihydroxyphenyl)-8-(1,1-dimethylprop-2-enyl)-7-hydroxy-5-methoxy-coumarin | Androgen receptor | AR |
| 550 | MOL004849 | 3-(2,4-dihydroxyphenyl)-8-(1,1-dimethylprop-2-enyl)-7-hydroxy-5-methoxy-coumarin | Peroxisome proliferator activated receptor gamma | PPARG |
| 551 | MOL004849 | 3-(2,4-dihydroxyphenyl)-8-(1,1-dimethylprop-2-enyl)-7-hydroxy-5-methoxy-coumarin | Coagulation factor VII | F7 |
| 552 | MOL004849 | 3-(2,4-dihydroxyphenyl)-8-(1,1-dimethylprop-2-enyl)-7-hydroxy-5-methoxy-coumarin | Estrogen receptor beta | ESR2 |
| 553 | MOL004849 | 3-(2,4-dihydroxyphenyl)-8-(1,1-dimethylprop-2-enyl)-7-hydroxy-5-methoxy-coumarin | Glycogen synthase kinase-3 beta | GSK3B |
| 554 | MOL004849 | 3-(2,4-dihydroxyphenyl)-8-(1,1-dimethylprop-2-enyl)-7-hydroxy-5-methoxy-coumarin | Serine/threonine-protein kinase Chk1 | CHEK1 |
| 555 | MOL004849 | 3-(2,4-dihydroxyphenyl)-8-(1,1-dimethylprop-2-enyl)-7-hydroxy-5-methoxy-coumarin | Trypsin-1 | PRSS1 |
| 556 | MOL004849 | 3-(2,4-dihydroxyphenyl)-8-(1,1-dimethylprop-2-enyl)-7-hydroxy-5-methoxy-coumarin | Nuclear receptor coactivator 2 | NCOA2 |
| 557 | MOL004849 | 3-(2,4-dihydroxyphenyl)-8-(1,1-dimethylprop-2-enyl)-7-hydroxy-5-methoxy-coumarin | Nuclear receptor coactivator 1 | NCOA1 |
| 558 | MOL004855 | Licoricone | Estrogen receptor | ESR1 |
| 559 | MOL004855 | Licoricone | Androgen receptor | AR |
| 560 | MOL004855 | Licoricone | Peroxisome proliferator activated receptor gamma | PPARG |
| 561 | MOL004855 | Licoricone | Serine/threonine-protein kinase Chk1 | CHEK1 |
| 562 | MOL004855 | Licoricone | Trypsin-1 | PRSS1 |
| 563 | MOL004855 | Licoricone | Nuclear receptor coactivator 2 | NCOA2 |
| 564 | MOL004856 | Gancaonin A | Estrogen receptor | ESR1 |
| 565 | MOL004856 | Gancaonin A | Androgen receptor | AR |
| 566 | MOL004856 | Gancaonin A | Peroxisome proliferator activated receptor gamma | PPARG |
| 567 | MOL004856 | Gancaonin A | Acetylcholinesterase | ACHE |
| 568 | MOL004856 | Gancaonin A | Estrogen receptor beta | ESR2 |
| 569 | MOL004856 | Gancaonin A | Glycogen synthase kinase-3 beta | GSK3B |
| 570 | MOL004856 | Gancaonin A | Serine/threonine-protein kinase Chk1 | CHEK1 |
| 571 | MOL004856 | Gancaonin A | Trypsin-1 | PRSS1 |
| 572 | MOL004856 | Gancaonin A | Nuclear receptor coactivator 2 | NCOA2 |
| 573 | MOL004857 | Gancaonin B | Estrogen receptor | ESR1 |
| 574 | MOL004857 | Gancaonin B | Androgen receptor | AR |
| 575 | MOL004857 | Gancaonin B | Peroxisome proliferator activated receptor gamma | PPARG |
| 576 | MOL004857 | Gancaonin B | Coagulation factor VII | F7 |
| 577 | MOL004857 | Gancaonin B | Estrogen receptor beta | ESR2 |
| 578 | MOL004857 | Gancaonin B | Glycogen synthase kinase-3 beta | GSK3B |
| 579 | MOL004857 | Gancaonin B | Serine/threonine-protein kinase Chk1 | CHEK1 |
| 580 | MOL004857 | Gancaonin B | Trypsin-1 | PRSS1 |
| 581 | MOL004857 | Gancaonin B | Nuclear receptor coactivator 2 | NCOA2 |
| 582 | MOL004863 | 3-(3,4-dihydroxyphenyl)-5,7-dihydroxy-8-(3-methylbut-2-enyl)chromone | Estrogen receptor | ESR1 |
| 583 | MOL004863 | 3-(3,4-dihydroxyphenyl)-5,7-dihydroxy-8-(3-methylbut-2-enyl)chromone | Androgen receptor | AR |
| 584 | MOL004863 | 3-(3,4-dihydroxyphenyl)-5,7-dihydroxy-8-(3-methylbut-2-enyl)chromone | Peroxisome proliferator activated receptor gamma | PPARG |
| 585 | MOL004863 | 3-(3,4-dihydroxyphenyl)-5,7-dihydroxy-8-(3-methylbut-2-enyl)chromone | Glycogen synthase kinase-3 beta | GSK3B |
| 586 | MOL004863 | 3-(3,4-dihydroxyphenyl)-5,7-dihydroxy-8-(3-methylbut-2-enyl)chromone | Serine/threonine-protein kinase Chk1 | CHEK1 |
| 587 | MOL004863 | 3-(3,4-dihydroxyphenyl)-5,7-dihydroxy-8-(3-methylbut-2-enyl)chromone | Trypsin-1 | PRSS1 |
| 588 | MOL004863 | 3-(3,4-dihydroxyphenyl)-5,7-dihydroxy-8-(3-methylbut-2-enyl)chromone | Nuclear receptor coactivator 2 | NCOA2 |
| 589 | MOL004864 | 5,7-dihydroxy-3-(4-methoxyphenyl)-8-(3-methylbut-2-enyl)chromone | Estrogen receptor | ESR1 |
| 590 | MOL004864 | 5,7-dihydroxy-3-(4-methoxyphenyl)-8-(3-methylbut-2-enyl)chromone | Androgen receptor | AR |
| 591 | MOL004864 | 5,7-dihydroxy-3-(4-methoxyphenyl)-8-(3-methylbut-2-enyl)chromone | Peroxisome proliferator activated receptor gamma | PPARG |
| 592 | MOL004864 | 5,7-dihydroxy-3-(4-methoxyphenyl)-8-(3-methylbut-2-enyl)chromone | Estrogen receptor beta | ESR2 |
| 593 | MOL004864 | 5,7-dihydroxy-3-(4-methoxyphenyl)-8-(3-methylbut-2-enyl)chromone | Glycogen synthase kinase-3 beta | GSK3B |
| 594 | MOL004864 | 5,7-dihydroxy-3-(4-methoxyphenyl)-8-(3-methylbut-2-enyl)chromone | Serine/threonine-protein kinase Chk1 | CHEK1 |
| 595 | MOL004864 | 5,7-dihydroxy-3-(4-methoxyphenyl)-8-(3-methylbut-2-enyl)chromone | Trypsin-1 | PRSS1 |
| 596 | MOL004864 | 5,7-dihydroxy-3-(4-methoxyphenyl)-8-(3-methylbut-2-enyl)chromone | Nuclear receptor coactivator 2 | NCOA2 |
| 597 | MOL004866 | 2-(3,4-dihydroxyphenyl)-5,7-dihydroxy-6-(3-methylbut-2-enyl)chromone | Androgen receptor | AR |
| 598 | MOL004866 | 2-(3,4-dihydroxyphenyl)-5,7-dihydroxy-6-(3-methylbut-2-enyl)chromone | Peroxisome proliferator activated receptor gamma | PPARG |
| 599 | MOL004866 | 2-(3,4-dihydroxyphenyl)-5,7-dihydroxy-6-(3-methylbut-2-enyl)chromone | Coagulation factor VII | F7 |
| 600 | MOL004866 | 2-(3,4-dihydroxyphenyl)-5,7-dihydroxy-6-(3-methylbut-2-enyl)chromone | Serine/threonine-protein kinase Chk1 | CHEK1 |
| 601 | MOL004866 | 2-(3,4-dihydroxyphenyl)-5,7-dihydroxy-6-(3-methylbut-2-enyl)chromone | Trypsin-1 | PRSS1 |
| 602 | MOL004879 | Glycyrin | Estrogen receptor | ESR1 |
| 603 | MOL004879 | Glycyrin | Androgen receptor | AR |
| 604 | MOL004879 | Glycyrin | Peroxisome proliferator activated receptor gamma | PPARG |
| 605 | MOL004879 | Glycyrin | Estrogen receptor beta | ESR2 |
| 606 | MOL004879 | Glycyrin | Serine/threonine-protein kinase Chk1 | CHEK1 |
| 607 | MOL004879 | Glycyrin | Trypsin-1 | PRSS1 |
| 608 | MOL004879 | Glycyrin | Nuclear receptor coactivator 2 | NCOA2 |
| 609 | MOL004882 | Licocoumarone | Estrogen receptor | ESR1 |
| 610 | MOL004882 | Licocoumarone | Androgen receptor | AR |
| 611 | MOL004882 | Licocoumarone | Estrogen receptor beta | ESR2 |
| 612 | MOL004882 | Licocoumarone | Glycogen synthase kinase-3 beta | GSK3B |
| 613 | MOL004883 | Licoisoflavone | Estrogen receptor | ESR1 |
| 614 | MOL004883 | Licoisoflavone | Androgen receptor | AR |
| 615 | MOL004883 | Licoisoflavone | Peroxisome proliferator activated receptor gamma | PPARG |
| 616 | MOL004883 | Licoisoflavone | Serine/threonine-protein kinase Chk1 | CHEK1 |
| 617 | MOL004883 | Licoisoflavone | Trypsin-1 | PRSS1 |
| 618 | MOL004883 | Licoisoflavone | Nuclear receptor coactivator 2 | NCOA2 |
| 619 | MOL004884 | Licoisoflavone B | Estrogen receptor | ESR1 |
| 620 | MOL004884 | Licoisoflavone B | Androgen receptor | AR |
| 621 | MOL004884 | Licoisoflavone B | Peroxisome proliferator activated receptor gamma | PPARG |
| 622 | MOL004884 | Licoisoflavone B | Acetylcholinesterase | ACHE |
| 623 | MOL004884 | Licoisoflavone B | Estrogen receptor beta | ESR2 |
| 624 | MOL004884 | Licoisoflavone B | Glycogen synthase kinase-3 beta | GSK3B |
| 625 | MOL004884 | Licoisoflavone B | Serine/threonine-protein kinase Chk1 | CHEK1 |
| 626 | MOL004884 | Licoisoflavone B | Trypsin-1 | PRSS1 |
| 627 | MOL004885 | licoisoflavanone | Prostaglandin G/H synthase 1 | PTGS1 |
| 628 | MOL004885 | licoisoflavanone | Estrogen receptor | ESR1 |
| 629 | MOL004885 | licoisoflavanone | Androgen receptor | AR |
| 630 | MOL004885 | licoisoflavanone | Peroxisome proliferator activated receptor gamma | PPARG |
| 631 | MOL004885 | licoisoflavanone | Coagulation factor VII | F7 |
| 632 | MOL004885 | licoisoflavanone | Acetylcholinesterase | ACHE |
| 633 | MOL004885 | licoisoflavanone | Estrogen receptor beta | ESR2 |
| 634 | MOL004885 | licoisoflavanone | Glycogen synthase kinase-3 beta | GSK3B |
| 635 | MOL004885 | licoisoflavanone | Trypsin-1 | PRSS1 |
| 636 | MOL004885 | licoisoflavanone | Nuclear receptor coactivator 1 | NCOA1 |
| 637 | MOL004891 | shinpterocarpin | Prostaglandin G/H synthase 1 | PTGS1 |
| 638 | MOL004891 | shinpterocarpin | Muscarinic acetylcholine receptor M3 | CHRM3 |
| 639 | MOL004891 | shinpterocarpin | Muscarinic acetylcholine receptor M1 | CHRM1 |
| 640 | MOL004891 | shinpterocarpin | Estrogen receptor | ESR1 |
| 641 | MOL004891 | shinpterocarpin | Androgen receptor | AR |
| 642 | MOL004891 | shinpterocarpin | Peroxisome proliferator activated receptor gamma | PPARG |
| 643 | MOL004891 | shinpterocarpin | 5-hydroxytryptamine receptor 3A | HTR3A |
| 644 | MOL004891 | shinpterocarpin | Estrogen receptor beta | ESR2 |
| 645 | MOL004891 | shinpterocarpin | Glycogen synthase kinase-3 beta | GSK3B |
| 646 | MOL004891 | shinpterocarpin | Retinoic acid receptor RXR-beta | RXRB |
| 647 | MOL004891 | shinpterocarpin | Trypsin-1 | PRSS1 |
| 648 | MOL004891 | shinpterocarpin | Nuclear receptor coactivator 1 | NCOA1 |
| 649 | MOL004898 | (E)-3-[3,4-dihydroxy-5-(3-methylbut-2-enyl)phenyl]-1-(2,4-dihydroxyphenyl)prop-2-en-1-one | Estrogen receptor | ESR1 |
| 650 | MOL004898 | (E)-3-[3,4-dihydroxy-5-(3-methylbut-2-enyl)phenyl]-1-(2,4-dihydroxyphenyl)prop-2-en-1-one | Androgen receptor | AR |
| 651 | MOL004898 | (E)-3-[3,4-dihydroxy-5-(3-methylbut-2-enyl)phenyl]-1-(2,4-dihydroxyphenyl)prop-2-en-1-one | Peroxisome proliferator activated receptor gamma | PPARG |
| 652 | MOL004898 | (E)-3-[3,4-dihydroxy-5-(3-methylbut-2-enyl)phenyl]-1-(2,4-dihydroxyphenyl)prop-2-en-1-one | Glycogen synthase kinase-3 beta | GSK3B |
| 653 | MOL004898 | (E)-3-[3,4-dihydroxy-5-(3-methylbut-2-enyl)phenyl]-1-(2,4-dihydroxyphenyl)prop-2-en-1-one | Nuclear receptor coactivator 2 | NCOA2 |
| 654 | MOL004903 | liquiritin | Coagulation factor VII | F7 |
| 655 | MOL004904 | licopyranocoumarin | Estrogen receptor | ESR1 |
| 656 | MOL004904 | licopyranocoumarin | Androgen receptor | AR |
| 657 | MOL004904 | licopyranocoumarin | Peroxisome proliferator activated receptor gamma | PPARG |
| 658 | MOL004904 | licopyranocoumarin | Coagulation factor VII | F7 |
| 659 | MOL004904 | licopyranocoumarin | Acetylcholinesterase | ACHE |
| 660 | MOL004904 | licopyranocoumarin | Trypsin-1 | PRSS1 |
| 661 | MOL004907 | Glyzaglabrin | Prostaglandin G/H synthase 1 | PTGS1 |
| 662 | MOL004907 | Glyzaglabrin | Estrogen receptor | ESR1 |
| 663 | MOL004907 | Glyzaglabrin | Androgen receptor | AR |
| 664 | MOL004907 | Glyzaglabrin | Peroxisome proliferator activated receptor gamma | PPARG |
| 665 | MOL004907 | Glyzaglabrin | Estrogen receptor beta | ESR2 |
| 666 | MOL004907 | Glyzaglabrin | Glycogen synthase kinase-3 beta | GSK3B |
| 667 | MOL004907 | Glyzaglabrin | Serine/threonine-protein kinase Chk1 | CHEK1 |
| 668 | MOL004907 | Glyzaglabrin | Trypsin-1 | PRSS1 |
| 669 | MOL004908 | Glabridin | Muscarinic acetylcholine receptor M1 | CHRM1 |
| 670 | MOL004908 | Glabridin | Estrogen receptor | ESR1 |
| 671 | MOL004908 | Glabridin | Androgen receptor | AR |
| 672 | MOL004908 | Glabridin | Peroxisome proliferator activated receptor gamma | PPARG |
| 673 | MOL004908 | Glabridin | Acetylcholinesterase | ACHE |
| 674 | MOL004908 | Glabridin | Estrogen receptor beta | ESR2 |
| 675 | MOL004908 | Glabridin | Glycogen synthase kinase-3 beta | GSK3B |
| 676 | MOL004908 | Glabridin | Serine/threonine-protein kinase Chk1 | CHEK1 |
| 677 | MOL004908 | Glabridin | Retinoic acid receptor RXR-beta | RXRB |
| 678 | MOL004908 | Glabridin | Trypsin-1 | PRSS1 |
| 679 | MOL004908 | Glabridin | Nuclear receptor coactivator 2 | NCOA2 |
| 680 | MOL004908 | Glabridin | Nuclear receptor coactivator 1 | NCOA1 |
| 681 | MOL004910 | Glabranin | Prostaglandin G/H synthase 1 | PTGS1 |
| 682 | MOL004910 | Glabranin | Estrogen receptor | ESR1 |
| 683 | MOL004911 | Glabrene | Prostaglandin G/H synthase 1 | PTGS1 |
| 684 | MOL004911 | Glabrene | Estrogen receptor | ESR1 |
| 685 | MOL004911 | Glabrene | Androgen receptor | AR |
| 686 | MOL004911 | Glabrene | Peroxisome proliferator activated receptor gamma | PPARG |
| 687 | MOL004911 | Glabrene | Estrogen receptor beta | ESR2 |
| 688 | MOL004911 | Glabrene | Glycogen synthase kinase-3 beta | GSK3B |
| 689 | MOL004911 | Glabrene | Trypsin-1 | PRSS1 |
| 690 | MOL004911 | Glabrene | Nuclear receptor coactivator 2 | NCOA2 |
| 691 | MOL004912 | Glabrone | Prostaglandin G/H synthase 1 | PTGS1 |
| 692 | MOL004912 | Glabrone | Estrogen receptor | ESR1 |
| 693 | MOL004912 | Glabrone | Androgen receptor | AR |
| 694 | MOL004912 | Glabrone | Peroxisome proliferator activated receptor gamma | PPARG |
| 695 | MOL004912 | Glabrone | Acetylcholinesterase | ACHE |
| 696 | MOL004912 | Glabrone | Estrogen receptor beta | ESR2 |
| 697 | MOL004912 | Glabrone | Glycogen synthase kinase-3 beta | GSK3B |
| 698 | MOL004912 | Glabrone | Serine/threonine-protein kinase Chk1 | CHEK1 |
| 699 | MOL004912 | Glabrone | Trypsin-1 | PRSS1 |
| 700 | MOL004913 | 1,3-dihydroxy-9-methoxy-6-benzofurano[3,2-c]chromenone | Estrogen receptor | ESR1 |
| 701 | MOL004913 | 1,3-dihydroxy-9-methoxy-6-benzofurano[3,2-c]chromenone | Peroxisome proliferator activated receptor gamma | PPARG |
| 702 | MOL004913 | 1,3-dihydroxy-9-methoxy-6-benzofurano[3,2-c]chromenone | Estrogen receptor beta | ESR2 |
| 703 | MOL004913 | 1,3-dihydroxy-9-methoxy-6-benzofurano[3,2-c]chromenone | Glycogen synthase kinase-3 beta | GSK3B |
| 704 | MOL004913 | 1,3-dihydroxy-9-methoxy-6-benzofurano[3,2-c]chromenone | Serine/threonine-protein kinase Chk1 | CHEK1 |
| 705 | MOL004914 | 1,3-dihydroxy-8,9-dimethoxy-6-benzofurano[3,2-c]chromenone | Estrogen receptor | ESR1 |
| 706 | MOL004914 | 1,3-dihydroxy-8,9-dimethoxy-6-benzofurano[3,2-c]chromenone | Androgen receptor | AR |
| 707 | MOL004914 | 1,3-dihydroxy-8,9-dimethoxy-6-benzofurano[3,2-c]chromenone | Peroxisome proliferator activated receptor gamma | PPARG |
| 708 | MOL004914 | 1,3-dihydroxy-8,9-dimethoxy-6-benzofurano[3,2-c]chromenone | Glycogen synthase kinase-3 beta | GSK3B |
| 709 | MOL004914 | 1,3-dihydroxy-8,9-dimethoxy-6-benzofurano[3,2-c]chromenone | Serine/threonine-protein kinase Chk1 | CHEK1 |
| 710 | MOL004915 | Eurycarpin A | Estrogen receptor | ESR1 |
| 711 | MOL004915 | Eurycarpin A | Androgen receptor | AR |
| 712 | MOL004915 | Eurycarpin A | Peroxisome proliferator activated receptor gamma | PPARG |
| 713 | MOL004915 | Eurycarpin A | Estrogen receptor beta | ESR2 |
| 714 | MOL004915 | Eurycarpin A | Glycogen synthase kinase-3 beta | GSK3B |
| 715 | MOL004915 | Eurycarpin A | Serine/threonine-protein kinase Chk1 | CHEK1 |
| 716 | MOL004915 | Eurycarpin A | Trypsin-1 | PRSS1 |
| 717 | MOL004924 | (-)-Medicocarpin | Acetylcholinesterase | ACHE |
| 718 | MOL004935 | Sigmoidin-B | Estrogen receptor | ESR1 |
| 719 | MOL004941 | (2R)-7-hydroxy-2-(4-hydroxyphenyl)chroman-4-one | Prostaglandin G/H synthase 1 | PTGS1 |
| 720 | MOL004941 | (2R)-7-hydroxy-2-(4-hydroxyphenyl)chroman-4-one | Estrogen receptor | ESR1 |
| 721 | MOL004941 | (2R)-7-hydroxy-2-(4-hydroxyphenyl)chroman-4-one | Gamma-aminobutyric acid receptor subunit alpha-1 | GABRA1 |
| 722 | MOL004945 | (2S)-7-hydroxy-2-(4-hydroxyphenyl)-8-(3-methylbut-2-enyl)chroman-4-one | Prostaglandin G/H synthase 1 | PTGS1 |
| 723 | MOL004945 | (2S)-7-hydroxy-2-(4-hydroxyphenyl)-8-(3-methylbut-2-enyl)chroman-4-one | Estrogen receptor | ESR1 |
| 724 | MOL004945 | (2S)-7-hydroxy-2-(4-hydroxyphenyl)-8-(3-methylbut-2-enyl)chroman-4-one | Estrogen receptor beta | ESR2 |
| 725 | MOL004948 | Isoglycyrol | Estrogen receptor | ESR1 |
| 726 | MOL004948 | Isoglycyrol | Androgen receptor | AR |
| 727 | MOL004948 | Isoglycyrol | Glycogen synthase kinase-3 beta | GSK3B |
| 728 | MOL004949 | Isolicoflavonol | Estrogen receptor | ESR1 |
| 729 | MOL004949 | Isolicoflavonol | Androgen receptor | AR |
| 730 | MOL004949 | Isolicoflavonol | Peroxisome proliferator activated receptor gamma | PPARG |
| 731 | MOL004949 | Isolicoflavonol | Glycogen synthase kinase-3 beta | GSK3B |
| 732 | MOL004949 | Isolicoflavonol | Trypsin-1 | PRSS1 |
| 733 | MOL004949 | Isolicoflavonol | Nuclear receptor coactivator 2 | NCOA2 |
| 734 | MOL004957 | HMO | Prostaglandin G/H synthase 1 | PTGS1 |
| 735 | MOL004957 | HMO | Muscarinic acetylcholine receptor M1 | CHRM1 |
| 736 | MOL004957 | HMO | Estrogen receptor | ESR1 |
| 737 | MOL004957 | HMO | Androgen receptor | AR |
| 738 | MOL004957 | HMO | Peroxisome proliferator activated receptor gamma | PPARG |
| 739 | MOL004957 | HMO | Estrogen receptor beta | ESR2 |
| 740 | MOL004957 | HMO | Glycogen synthase kinase-3 beta | GSK3B |
| 741 | MOL004957 | HMO | Serine/threonine-protein kinase Chk1 | CHEK1 |
| 742 | MOL004957 | HMO | Trypsin-1 | PRSS1 |
| 743 | MOL004959 | 1-Methoxyphaseollidin | Prostaglandin G/H synthase 1 | PTGS1 |
| 744 | MOL004959 | 1-Methoxyphaseollidin | Estrogen receptor | ESR1 |
| 745 | MOL004959 | 1-Methoxyphaseollidin | Androgen receptor | AR |
| 746 | MOL004959 | 1-Methoxyphaseollidin | Peroxisome proliferator activated receptor gamma | PPARG |
| 747 | MOL004959 | 1-Methoxyphaseollidin | Estrogen receptor beta | ESR2 |
| 748 | MOL004959 | 1-Methoxyphaseollidin | Glycogen synthase kinase-3 beta | GSK3B |
| 749 | MOL004959 | 1-Methoxyphaseollidin | Trypsin-1 | PRSS1 |
| 750 | MOL004959 | 1-Methoxyphaseollidin | Nuclear receptor coactivator 2 | NCOA2 |
| 751 | MOL004959 | 1-Methoxyphaseollidin | Nuclear receptor coactivator 1 | NCOA1 |
| 752 | MOL004961 | Quercetin der. | Prostaglandin G/H synthase 1 | PTGS1 |
| 753 | MOL004961 | Quercetin der. | Estrogen receptor | ESR1 |
| 754 | MOL004961 | Quercetin der. | Androgen receptor | AR |
| 755 | MOL004961 | Quercetin der. | Peroxisome proliferator activated receptor gamma | PPARG |
| 756 | MOL004961 | Quercetin der. | Estrogen receptor beta | ESR2 |
| 757 | MOL004961 | Quercetin der. | Glycogen synthase kinase-3 beta | GSK3B |
| 758 | MOL004961 | Quercetin der. | Trypsin-1 | PRSS1 |
| 759 | MOL004961 | Quercetin der. | Nuclear receptor coactivator 2 | NCOA2 |
| 760 | MOL004966 | 3'-Hydroxy-4'-O-Methylglabridin | Prostaglandin G/H synthase 1 | PTGS1 |
| 761 | MOL004966 | 3'-Hydroxy-4'-O-Methylglabridin | Estrogen receptor | ESR1 |
| 762 | MOL004966 | 3'-Hydroxy-4'-O-Methylglabridin | Androgen receptor | AR |
| 763 | MOL004966 | 3'-Hydroxy-4'-O-Methylglabridin | Peroxisome proliferator activated receptor gamma | PPARG |
| 764 | MOL004966 | 3'-Hydroxy-4'-O-Methylglabridin | Coagulation factor VII | F7 |
| 765 | MOL004966 | 3'-Hydroxy-4'-O-Methylglabridin | Estrogen receptor beta | ESR2 |
| 766 | MOL004966 | 3'-Hydroxy-4'-O-Methylglabridin | Glycogen synthase kinase-3 beta | GSK3B |
| 767 | MOL004966 | 3'-Hydroxy-4'-O-Methylglabridin | Serine/threonine-protein kinase Chk1 | CHEK1 |
| 768 | MOL004966 | 3'-Hydroxy-4'-O-Methylglabridin | Trypsin-1 | PRSS1 |
| 769 | MOL004966 | 3'-Hydroxy-4'-O-Methylglabridin | Nuclear receptor coactivator 2 | NCOA2 |
| 770 | MOL004966 | 3'-Hydroxy-4'-O-Methylglabridin | Nuclear receptor coactivator 1 | NCOA1 |
| 771 | MOL000497 | licochalcone a | Prostaglandin G/H synthase 1 | PTGS1 |
| 772 | MOL000497 | licochalcone a | Muscarinic acetylcholine receptor M1 | CHRM1 |
| 773 | MOL000497 | licochalcone a | Estrogen receptor | ESR1 |
| 774 | MOL000497 | licochalcone a | Androgen receptor | AR |
| 775 | MOL000497 | licochalcone a | Peroxisome proliferator activated receptor gamma | PPARG |
| 776 | MOL000497 | licochalcone a | Estrogen receptor beta | ESR2 |
| 777 | MOL000497 | licochalcone a | Glycogen synthase kinase-3 beta | GSK3B |
| 778 | MOL000497 | licochalcone a | Serine/threonine-protein kinase Chk1 | CHEK1 |
| 779 | MOL000497 | licochalcone a | Nuclear receptor coactivator 2 | NCOA2 |
| 780 | MOL000497 | licochalcone a | Transcription factor p65 | RELA |
| 781 | MOL000497 | licochalcone a | G1/S-specific cyclin-D1 | CCND1 |
| 782 | MOL000497 | licochalcone a | Apoptosis regulator Bcl-2 | BCL2 |
| 783 | MOL000497 | licochalcone a | Eukaryotic translation initiation factor 6 | EIF6 |
| 784 | MOL000497 | licochalcone a | Retinoblastoma-associated protein | RB1 |
| 785 | MOL004974 | 3'-Methoxyglabridin | Prostaglandin G/H synthase 1 | PTGS1 |
| 786 | MOL004974 | 3'-Methoxyglabridin | Estrogen receptor | ESR1 |
| 787 | MOL004974 | 3'-Methoxyglabridin | Androgen receptor | AR |
| 788 | MOL004974 | 3'-Methoxyglabridin | Peroxisome proliferator activated receptor gamma | PPARG |
| 789 | MOL004974 | 3'-Methoxyglabridin | Coagulation factor VII | F7 |
| 790 | MOL004974 | 3'-Methoxyglabridin | Acetylcholinesterase | ACHE |
| 791 | MOL004974 | 3'-Methoxyglabridin | Estrogen receptor beta | ESR2 |
| 792 | MOL004974 | 3'-Methoxyglabridin | Glycogen synthase kinase-3 beta | GSK3B |
| 793 | MOL004974 | 3'-Methoxyglabridin | Serine/threonine-protein kinase Chk1 | CHEK1 |
| 794 | MOL004974 | 3'-Methoxyglabridin | Trypsin-1 | PRSS1 |
| 795 | MOL004974 | 3'-Methoxyglabridin | Nuclear receptor coactivator 2 | NCOA2 |
| 796 | MOL004974 | 3'-Methoxyglabridin | Nuclear receptor coactivator 1 | NCOA1 |
| 797 | MOL004978 | 2-[(3R)-8,8-dimethyl-3,4-dihydro-2H-pyrano[6,5-f]chromen-3-yl]-5-methoxyphenol | Prostaglandin G/H synthase 1 | PTGS1 |
| 798 | MOL004978 | 2-[(3R)-8,8-dimethyl-3,4-dihydro-2H-pyrano[6,5-f]chromen-3-yl]-5-methoxyphenol | Muscarinic acetylcholine receptor M3 | CHRM3 |
| 799 | MOL004978 | 2-[(3R)-8,8-dimethyl-3,4-dihydro-2H-pyrano[6,5-f]chromen-3-yl]-5-methoxyphenol | Muscarinic acetylcholine receptor M1 | CHRM1 |
| 800 | MOL004978 | 2-[(3R)-8,8-dimethyl-3,4-dihydro-2H-pyrano[6,5-f]chromen-3-yl]-5-methoxyphenol | Estrogen receptor | ESR1 |
| 801 | MOL004978 | 2-[(3R)-8,8-dimethyl-3,4-dihydro-2H-pyrano[6,5-f]chromen-3-yl]-5-methoxyphenol | Androgen receptor | AR |
| 802 | MOL004978 | 2-[(3R)-8,8-dimethyl-3,4-dihydro-2H-pyrano[6,5-f]chromen-3-yl]-5-methoxyphenol | Peroxisome proliferator activated receptor gamma | PPARG |
| 803 | MOL004978 | 2-[(3R)-8,8-dimethyl-3,4-dihydro-2H-pyrano[6,5-f]chromen-3-yl]-5-methoxyphenol | Acetylcholinesterase | ACHE |
| 804 | MOL004978 | 2-[(3R)-8,8-dimethyl-3,4-dihydro-2H-pyrano[6,5-f]chromen-3-yl]-5-methoxyphenol | Estrogen receptor beta | ESR2 |
| 805 | MOL004978 | 2-[(3R)-8,8-dimethyl-3,4-dihydro-2H-pyrano[6,5-f]chromen-3-yl]-5-methoxyphenol | Glycogen synthase kinase-3 beta | GSK3B |
| 806 | MOL004978 | 2-[(3R)-8,8-dimethyl-3,4-dihydro-2H-pyrano[6,5-f]chromen-3-yl]-5-methoxyphenol | Serine/threonine-protein kinase Chk1 | CHEK1 |
| 807 | MOL004978 | 2-[(3R)-8,8-dimethyl-3,4-dihydro-2H-pyrano[6,5-f]chromen-3-yl]-5-methoxyphenol | Retinoic acid receptor RXR-beta | RXRB |
| 808 | MOL004978 | 2-[(3R)-8,8-dimethyl-3,4-dihydro-2H-pyrano[6,5-f]chromen-3-yl]-5-methoxyphenol | Trypsin-1 | PRSS1 |
| 809 | MOL004978 | 2-[(3R)-8,8-dimethyl-3,4-dihydro-2H-pyrano[6,5-f]chromen-3-yl]-5-methoxyphenol | Nuclear receptor coactivator 2 | NCOA2 |
| 810 | MOL004978 | 2-[(3R)-8,8-dimethyl-3,4-dihydro-2H-pyrano[6,5-f]chromen-3-yl]-5-methoxyphenol | Nuclear receptor coactivator 1 | NCOA1 |
| 811 | MOL004980 | Inflacoumarin A | Estrogen receptor | ESR1 |
| 812 | MOL004980 | Inflacoumarin A | Androgen receptor | AR |
| 813 | MOL004980 | Inflacoumarin A | Peroxisome proliferator activated receptor gamma | PPARG |
| 814 | MOL004980 | Inflacoumarin A | Trypsin-1 | PRSS1 |
| 815 | MOL004980 | Inflacoumarin A | Nuclear receptor coactivator 2 | NCOA2 |
| 816 | MOL004980 | Inflacoumarin A | Prostaglandin G/H synthase 1 | PTGS1 |
| 817 | MOL004985 | icos-5-enoic acid | Nuclear receptor coactivator 2 | NCOA2 |
| 818 | MOL004988 | Kanzonol F | Estrogen receptor | ESR1 |
| 819 | MOL004988 | Kanzonol F | Androgen receptor | AR |
| 820 | MOL004988 | Kanzonol F | Estrogen receptor beta | ESR2 |
| 821 | MOL004988 | Kanzonol F | Nuclear receptor coactivator 2 | NCOA2 |
| 822 | MOL004989 | 6-prenylated eriodictyol | Estrogen receptor | ESR1 |
| 823 | MOL004989 | 6-prenylated eriodictyol | Coagulation factor VII | F7 |
| 824 | MOL004990 | 7,2',4'-trihydroxy锛?-methoxy-3锛峚rylcoumarin | Prostaglandin G/H synthase 1 | PTGS1 |
| 825 | MOL004990 | 7,2',4'-trihydroxy锛?-methoxy-3锛峚rylcoumarin | Estrogen receptor | ESR1 |
| 826 | MOL004990 | 7,2',4'-trihydroxy锛?-methoxy-3锛峚rylcoumarin | Androgen receptor | AR |
| 827 | MOL004990 | 7,2',4'-trihydroxy锛?-methoxy-3锛峚rylcoumarin | Peroxisome proliferator activated receptor gamma | PPARG |
| 828 | MOL004990 | 7,2',4'-trihydroxy锛?-methoxy-3锛峚rylcoumarin | Estrogen receptor beta | ESR2 |
| 829 | MOL004990 | 7,2',4'-trihydroxy锛?-methoxy-3锛峚rylcoumarin | Glycogen synthase kinase-3 beta | GSK3B |
| 830 | MOL004990 | 7,2',4'-trihydroxy锛?-methoxy-3锛峚rylcoumarin | Serine/threonine-protein kinase Chk1 | CHEK1 |
| 831 | MOL004991 | 7-Acetoxy-2-methylisoflavone | Prostaglandin G/H synthase 1 | PTGS1 |
| 832 | MOL004991 | 7-Acetoxy-2-methylisoflavone | Estrogen receptor | ESR1 |
| 833 | MOL004991 | 7-Acetoxy-2-methylisoflavone | Androgen receptor | AR |
| 834 | MOL004991 | 7-Acetoxy-2-methylisoflavone | Peroxisome proliferator activated receptor gamma | PPARG |
| 835 | MOL004991 | 7-Acetoxy-2-methylisoflavone | Acetylcholinesterase | ACHE |
| 836 | MOL004991 | 7-Acetoxy-2-methylisoflavone | Gamma-aminobutyric acid receptor subunit alpha-1 | GABRA1 |
| 837 | MOL004991 | 7-Acetoxy-2-methylisoflavone | Glycogen synthase kinase-3 beta | GSK3B |
| 838 | MOL004991 | 7-Acetoxy-2-methylisoflavone | Serine/threonine-protein kinase Chk1 | CHEK1 |
| 839 | MOL004991 | 7-Acetoxy-2-methylisoflavone | Trypsin-1 | PRSS1 |
| 840 | MOL004991 | 7-Acetoxy-2-methylisoflavone | Nuclear receptor coactivator 2 | NCOA2 |
| 841 | MOL004993 | 8-prenylated eriodictyol | Estrogen receptor | ESR1 |
| 842 | MOL004993 | 8-prenylated eriodictyol | Coagulation factor VII | F7 |
| 843 | MOL004993 | 8-prenylated eriodictyol | Nuclear receptor coactivator 1 | NCOA1 |
| 844 | MOL004996 | gadelaidic acid | Nuclear receptor coactivator 2 | NCOA2 |
| 845 | MOL000500 | Vestitol | Prostaglandin G/H synthase 1 | PTGS1 |
| 846 | MOL000500 | Vestitol | Muscarinic acetylcholine receptor M1 | CHRM1 |
| 847 | MOL000500 | Vestitol | Estrogen receptor | ESR1 |
| 848 | MOL000500 | Vestitol | Androgen receptor | AR |
| 849 | MOL000500 | Vestitol | Peroxisome proliferator activated receptor gamma | PPARG |
| 850 | MOL000500 | Vestitol | Muscarinic acetylcholine receptor M4 | CHRM4 |
| 851 | MOL000500 | Vestitol | Alpha-1A adrenergic receptor | ADRA1A |
| 852 | MOL000500 | Vestitol | Estrogen receptor beta | ESR2 |
| 853 | MOL000500 | Vestitol | Glycogen synthase kinase-3 beta | GSK3B |
| 854 | MOL000500 | Vestitol | Serine/threonine-protein kinase Chk1 | CHEK1 |
| 855 | MOL000500 | Vestitol | Trypsin-1 | PRSS1 |
| 856 | MOL005000 | Gancaonin G | Estrogen receptor | ESR1 |
| 857 | MOL005000 | Gancaonin G | Androgen receptor | AR |
| 858 | MOL005000 | Gancaonin G | Peroxisome proliferator activated receptor gamma | PPARG |
| 859 | MOL005000 | Gancaonin G | Estrogen receptor beta | ESR2 |
| 860 | MOL005000 | Gancaonin G | Glycogen synthase kinase-3 beta | GSK3B |
| 861 | MOL005000 | Gancaonin G | Serine/threonine-protein kinase Chk1 | CHEK1 |
| 862 | MOL005000 | Gancaonin G | Trypsin-1 | PRSS1 |
| 863 | MOL005000 | Gancaonin G | Nuclear receptor coactivator 2 | NCOA2 |
| 864 | MOL005001 | Gancaonin H | Estrogen receptor | ESR1 |
| 865 | MOL005001 | Gancaonin H | Androgen receptor | AR |
| 866 | MOL005001 | Gancaonin H | Trypsin-1 | PRSS1 |
| 867 | MOL005001 | Gancaonin H | Nuclear receptor coactivator 2 | NCOA2 |
| 868 | MOL005003 | Licoagrocarpin | Prostaglandin G/H synthase 1 | PTGS1 |
| 869 | MOL005003 | Licoagrocarpin | Muscarinic acetylcholine receptor M3 | CHRM3 |
| 870 | MOL005003 | Licoagrocarpin | Muscarinic acetylcholine receptor M1 | CHRM1 |
| 871 | MOL005003 | Licoagrocarpin | Estrogen receptor | ESR1 |
| 872 | MOL005003 | Licoagrocarpin | Androgen receptor | AR |
| 873 | MOL005003 | Licoagrocarpin | Peroxisome proliferator activated receptor gamma | PPARG |
| 874 | MOL005003 | Licoagrocarpin | Muscarinic acetylcholine receptor M5 | CHRM5 |
| 875 | MOL005003 | Licoagrocarpin | Acetylcholinesterase | ACHE |
| 876 | MOL005003 | Licoagrocarpin | Estrogen receptor beta | ESR2 |
| 877 | MOL005003 | Licoagrocarpin | Glycogen synthase kinase-3 beta | GSK3B |
| 878 | MOL005003 | Licoagrocarpin | Retinoic acid receptor RXR-beta | RXRB |
| 879 | MOL005003 | Licoagrocarpin | Trypsin-1 | PRSS1 |
| 880 | MOL005003 | Licoagrocarpin | Nuclear receptor coactivator 2 | NCOA2 |
| 881 | MOL005007 | Glyasperins M | Prostaglandin G/H synthase 1 | PTGS1 |
| 882 | MOL005007 | Glyasperins M | Estrogen receptor | ESR1 |
| 883 | MOL005007 | Glyasperins M | Androgen receptor | AR |
| 884 | MOL005007 | Glyasperins M | Peroxisome proliferator activated receptor gamma | PPARG |
| 885 | MOL005007 | Glyasperins M | Coagulation factor VII | F7 |
| 886 | MOL005007 | Glyasperins M | Acetylcholinesterase | ACHE |
| 887 | MOL005007 | Glyasperins M | Estrogen receptor beta | ESR2 |
| 888 | MOL005007 | Glyasperins M | Glycogen synthase kinase-3 beta | GSK3B |
| 889 | MOL005007 | Glyasperins M | Trypsin-1 | PRSS1 |
| 890 | MOL005007 | Glyasperins M | Nuclear receptor coactivator 2 | NCOA2 |
| 891 | MOL005007 | Glyasperins M | Nuclear receptor coactivator 1 | NCOA1 |
| 892 | MOL005008 | Glycyrrhiza flavonol A | Estrogen receptor | ESR1 |
| 893 | MOL005008 | Glycyrrhiza flavonol A | Androgen receptor | AR |
| 894 | MOL005008 | Glycyrrhiza flavonol A | Coagulation factor VII | F7 |
| 895 | MOL005008 | Glycyrrhiza flavonol A | Acetylcholinesterase | ACHE |
| 896 | MOL005008 | Glycyrrhiza flavonol A | Estrogen receptor beta | ESR2 |
| 897 | MOL005008 | Glycyrrhiza flavonol A | Glycogen synthase kinase-3 beta | GSK3B |
| 898 | MOL005008 | Glycyrrhiza flavonol A | Trypsin-1 | PRSS1 |
| 899 | MOL005012 | Licoagroisoflavone | Estrogen receptor | ESR1 |
| 900 | MOL005012 | Licoagroisoflavone | Androgen receptor | AR |
| 901 | MOL005012 | Licoagroisoflavone | Peroxisome proliferator activated receptor gamma | PPARG |
| 902 | MOL005012 | Licoagroisoflavone | Estrogen receptor beta | ESR2 |
| 903 | MOL005012 | Licoagroisoflavone | Glycogen synthase kinase-3 beta | GSK3B |
| 904 | MOL005012 | Licoagroisoflavone | Serine/threonine-protein kinase Chk1 | CHEK1 |
| 905 | MOL005012 | Licoagroisoflavone | Trypsin-1 | PRSS1 |
| 906 | MOL005016 | Odoratin | Prostaglandin G/H synthase 1 | PTGS1 |
| 907 | MOL005016 | Odoratin | Estrogen receptor | ESR1 |
| 908 | MOL005016 | Odoratin | Androgen receptor | AR |
| 909 | MOL005016 | Odoratin | Peroxisome proliferator activated receptor gamma | PPARG |
| 910 | MOL005016 | Odoratin | Estrogen receptor beta | ESR2 |
| 911 | MOL005016 | Odoratin | Glycogen synthase kinase-3 beta | GSK3B |
| 912 | MOL005016 | Odoratin | Serine/threonine-protein kinase Chk1 | CHEK1 |
| 913 | MOL005016 | Odoratin | Trypsin-1 | PRSS1 |
| 914 | MOL005016 | Odoratin | Nuclear receptor coactivator 2 | NCOA2 |
| 915 | MOL005017 | Phaseol | Estrogen receptor | ESR1 |
| 916 | MOL005017 | Phaseol | Androgen receptor | AR |
| 917 | MOL005017 | Phaseol | Peroxisome proliferator activated receptor gamma | PPARG |
| 918 | MOL005017 | Phaseol | Glycogen synthase kinase-3 beta | GSK3B |
| 919 | MOL005017 | Phaseol | Serine/threonine-protein kinase Chk1 | CHEK1 |
| 920 | MOL005018 | Xambioona | Estrogen receptor | ESR1 |
| 921 | MOL005018 | Xambioona | Estrogen receptor beta | ESR2 |
| 922 | MOL005018 | Xambioona | Nuclear receptor coactivator 2 | NCOA2 |
| 923 | MOL005020 | dehydroglyasperins C | Estrogen receptor | ESR1 |
| 924 | MOL005020 | dehydroglyasperins C | Androgen receptor | AR |
| 925 | MOL005020 | dehydroglyasperins C | Peroxisome proliferator activated receptor gamma | PPARG |
| 926 | MOL005020 | dehydroglyasperins C | Estrogen receptor beta | ESR2 |
| 927 | MOL005020 | dehydroglyasperins C | Serine/threonine-protein kinase Chk1 | CHEK1 |
| 928 | MOL005020 | dehydroglyasperins C | Trypsin-1 | PRSS1 |
| 929 | MOL005020 | dehydroglyasperins C | Nuclear receptor coactivator 2 | NCOA2 |
| 930 | MOL000098 | quercetin | Prostaglandin G/H synthase 1 | PTGS1 |
| 931 | MOL000098 | quercetin | Androgen receptor | AR |
| 932 | MOL000098 | quercetin | Peroxisome proliferator activated receptor gamma | PPARG |
| 933 | MOL000098 | quercetin | Nuclear receptor coactivator 2 | NCOA2 |
| 934 | MOL000098 | quercetin | Aldose reductase | AKR1B1 |
| 935 | MOL000098 | quercetin | Trypsin-1 | PRSS1 |
| 936 | MOL000098 | quercetin | Coagulation factor VII | F7 |
| 937 | MOL000098 | quercetin | Acetylcholinesterase | ACHE |
| 938 | MOL000098 | quercetin | Gamma-aminobutyric acid receptor subunit alpha-1 | GABRA1 |
| 939 | MOL000098 | quercetin | Transcription factor p65 | RELA |
| 940 | MOL000098 | quercetin | Epidermal growth factor receptor | EGFR |
| 941 | MOL000098 | quercetin | Vascular endothelial growth factor A | VEGFA |
| 942 | MOL000098 | quercetin | G1/S-specific cyclin-D1 | CCND1 |
| 943 | MOL000098 | quercetin | Apoptosis regulator Bcl-2 | BCL2 |
| 944 | MOL000098 | quercetin | Proto-oncogene c-Fos | FOS |
| 945 | MOL000098 | quercetin | Eukaryotic translation initiation factor 6 | EIF6 |
| 946 | MOL000098 | quercetin | Caspase-9 | CASP9 |
| 947 | MOL000098 | quercetin | Urokinase-type plasminogen activator | PLAU |
| 948 | MOL000098 | quercetin | Retinoblastoma-associated protein | RB1 |
| 949 | MOL000098 | quercetin | Interleukin-6 | IL6 |
| 950 | MOL000098 | quercetin | Activator of 90 kDa heat shock protein ATPase homolog 1 | AHSA1 |
| 951 | MOL000098 | quercetin | Caspase-3 | CASP3 |
| 952 | MOL000098 | quercetin | Cellular tumor antigen p53 | TP63 |
| 953 | MOL000098 | quercetin | ETS domain-containing protein Elk-1 | ELK1 |
| 954 | MOL000098 | quercetin | NF-kappa-B inhibitor alpha | NFKBIA |
| 955 | MOL000098 | quercetin | NADPH--cytochrome P450 reductase | POR |
| 956 | MOL000098 | quercetin | Caspase-8 | CASP8 |
| 957 | MOL000098 | quercetin | RAF proto-oncogene serine/threonine-protein kinase | RAF1 |
| 958 | MOL000098 | quercetin | Protein kinase C alpha type | PRKCA |
| 959 | MOL000098 | quercetin | Hypoxia-inducible factor 1-alpha | HIF1A |
| 960 | MOL000098 | quercetin | Protein CBFA2T1 | RUNX1T1 |
| 961 | MOL000098 | quercetin | Receptor tyrosine-protein kinase erbB-2 | ERBB2 |
| 962 | MOL000098 | quercetin | Peroxisome proliferator-activated receptor gamma | PPARG |
| 963 | MOL000098 | quercetin | Acetyl-CoA carboxylase 1 | ACACA |
| 964 | MOL000098 | quercetin | Cytochrome P450 3A4 | CYP3A4 |
| 965 | MOL000098 | quercetin | Caveolin-1 | CAV1 |
| 966 | MOL000098 | quercetin | Myc proto-oncogene protein | MYC |
| 967 | MOL000098 | quercetin | Cytochrome P450 1A1 | CYP1A1 |
| 968 | MOL000098 | quercetin | Intercellular adhesion molecule 1 | ICAM1 |
| 969 | MOL000098 | quercetin | E-selectin | SELE |
| 970 | MOL000098 | quercetin | Vascular cell adhesion protein 1 | VCAM1 |
| 971 | MOL000098 | quercetin | Prostaglandin E2 receptor EP3 subtype | PTGER3 |
| 972 | MOL000098 | quercetin | Baculoviral IAP repeat-containing protein 5 | BIRC5 |
| 973 | MOL000098 | quercetin | Dual oxidase 2 | DUOX2 |
| 974 | MOL000098 | quercetin | Nitric oxide synthase, endothelial | NOS3 |
| 975 | MOL000098 | quercetin | Heat shock protein beta-1 | HSPB1 |
| 976 | MOL000098 | quercetin | Maltase-glucoamylase, intestinal | MGAM |
| 977 | MOL000098 | quercetin | Cytochrome P450 1B1 | CYP1B1 |
| 978 | MOL000098 | quercetin | G2/mitotic-specific cyclin-B1 | CCNB1 |
| 979 | MOL000098 | quercetin | Arachidonate 5-lipoxygenase | ALOX5 |
| 980 | MOL000098 | quercetin | Glutathione S-transferase P | GSTP1 |
| 981 | MOL000098 | quercetin | Nuclear factor erythroid 2-related factor 2 | NFE2L2 |
| 982 | MOL000098 | quercetin | NAD(P)H dehydrogenase [quinone] 1 | NQO1 |
| 983 | MOL000098 | quercetin | Poly [ADP-ribose] polymerase 1 | PARP1 |
| 984 | MOL000098 | quercetin | Aryl hydrocarbon receptor | AHR |
| 985 | MOL000098 | quercetin | 26S proteasome non-ATPase regulatory subunit 3 | PSMD3 |
| 986 | MOL000098 | quercetin | Solute carrier family 2, facilitated glucose transporter member 4 | SLC2A4 |
| 987 | MOL000098 | quercetin | Collagen alpha-1(III) chain | COL3A1 |
| 988 | MOL000098 | quercetin | DDB1- and CUL4-associated factor 5 | DCAF5 |
| 989 | MOL000098 | quercetin | Nuclear receptor subfamily 1 group I member 3 | NR1I3 |
| 990 | MOL000098 | quercetin | Serine/threonine-protein kinase Chk2 | CHEK2 |
| 991 | MOL000098 | quercetin | Heat shock factor protein 1 | HSF1 |
| 992 | MOL000098 | quercetin | C-reactive protein | CRP |
| 993 | MOL000098 | quercetin | Runt-related transcription factor 2 | RUNX2 |
| 994 | MOL000098 | quercetin | Ras association domain-containing protein 1 | RASSF1 |
| 995 | MOL000098 | quercetin | Cathepsin D | CTSD |
| 996 | MOL000098 | quercetin | Insulin-like growth factor-binding protein 3 | IGFBP3 |
| 997 | MOL000098 | quercetin | Insulin-like growth factor II | IGF2 |
| 998 | MOL000098 | quercetin | Interferon regulatory factor 1 | IRF1 |
| 999 | MOL000098 | quercetin | Receptor tyrosine-protein kinase erbB-3 | ERBB3 |
| 1000 | MOL000098 | quercetin | Serum paraoxonase/arylesterase 1 | PON1 |
| 1001 | MOL000098 | quercetin | Type I iodothyronine deiodinase | DIO1 |
| 1002 | MOL000098 | quercetin | Puromycin-sensitive aminopeptidase | NPEPPS |
| 1003 | MOL000098 | quercetin | Hexokinase-2 | HK2 |
| 1004 | MOL000098 | quercetin | Ras GTPase-activating protein 1 | RASA1 |
| 1005 | MOL000098 | quercetin | Glutathione S-transferase Mu 1 | GSTM1 |
| 1006 | MOL000098 | quercetin | Glutathione S-transferase Mu 2 | GSTM2 |
| 1007 | MOL001771 | poriferast-5-en-3beta-ol | Progesterone receptor | PGR |
| 1008 | MOL001771 | poriferast-5-en-3beta-ol | Nuclear receptor coactivator 2 | NCOA2 |
| 1009 | MOL002694 | 4-[(E)-4-(3,5-dimethoxy-4-oxo-1-cyclohexa-2,5-dienylidene)but-2-enylidene]-2,6-dimethoxycyclohexa-2,5-dien-1-one | Nuclear receptor coactivator 2 | NCOA2 |
| 1010 | MOL002695 | lignan | Estrogen receptor | ESR1 |
| 1011 | MOL002695 | lignan | Nuclear receptor coactivator 2 | NCOA2 |
| 1012 | MOL002710 | Pyrethrin II | Nuclear receptor coactivator 2 | NCOA2 |
| 1013 | MOL002712 | 6-Hydroxykaempferol | Prostaglandin G/H synthase 1 | PTGS1 |
| 1014 | MOL002712 | 6-Hydroxykaempferol | Androgen receptor | AR |
| 1015 | MOL002712 | 6-Hydroxykaempferol | Peroxisome proliferator activated receptor gamma | PPARG |
| 1016 | MOL002712 | 6-Hydroxykaempferol | Trypsin-1 | PRSS1 |
| 1017 | MOL002712 | 6-Hydroxykaempferol | Nuclear receptor coactivator 2 | NCOA2 |
| 1018 | MOL002714 | baicalein | Prostaglandin G/H synthase 1 | PTGS1 |
| 1019 | MOL002714 | baicalein | Androgen receptor | AR |
| 1020 | MOL002714 | baicalein | Trypsin-1 | PRSS1 |
| 1021 | MOL002714 | baicalein | Nuclear receptor coactivator 2 | NCOA2 |
| 1022 | MOL002714 | baicalein | Nuclear receptor coactivator 1 | NCOA1 |
| 1023 | MOL002714 | baicalein | Transcription factor p65 | RELA |
| 1024 | MOL002714 | baicalein | Vascular endothelial growth factor A | VEGFA |
| 1025 | MOL002714 | baicalein | Apoptosis regulator Bcl-2 | BCL2 |
| 1026 | MOL002714 | baicalein | Proto-oncogene c-Fos | FOS |
| 1027 | MOL002714 | baicalein | Caspase-3 | CASP3 |
| 1028 | MOL002714 | baicalein | Cellular tumor antigen p53 | TP63 |
| 1029 | MOL002714 | baicalein | Hypoxia-inducible factor 1-alpha | HIF1A |
| 1030 | MOL002714 | baicalein | Fos-related antigen 1 | FOSL1 |
| 1031 | MOL002714 | baicalein | G2/mitotic-specific cyclin-B1 | CCNB1 |
| 1032 | MOL002714 | baicalein | Aryl hydrocarbon receptor | AHR |
| 1033 | MOL002714 | baicalein | Insulin-like growth factor II | IGF2 |
| 1034 | MOL002714 | baicalein | Cytochrome c | CYCS |
| 1035 | MOL002714 | baicalein | NADPH oxidase 5 | NOX5 |
| 1036 | MOL002714 | baicalein | Apolipoprotein D | APOD |
| 1037 | MOL002717 | qt_carthamone | Prostaglandin G/H synthase 1 | PTGS1 |
| 1038 | MOL002721 | quercetagetin | Androgen receptor | AR |
| 1039 | MOL002721 | quercetagetin | Peroxisome proliferator activated receptor gamma | PPARG |
| 1040 | MOL002721 | quercetagetin | Trypsin-1 | PRSS1 |
| 1041 | MOL002757 | 7,8-dimethyl-1H-pyrimido[5,6-g]quinoxaline-2,4-dione | Prostaglandin G/H synthase 1 | PTGS1 |
| 1042 | MOL002757 | 7,8-dimethyl-1H-pyrimido[5,6-g]quinoxaline-2,4-dione | Gamma-aminobutyric acid receptor subunit alpha-1 | GABRA1 |
| 1043 | MOL002773 | beta-carotene | Vascular endothelial growth factor A | VEGFA |
| 1044 | MOL002773 | beta-carotene | Apoptosis regulator Bcl-2 | BCL2 |
| 1045 | MOL002773 | beta-carotene | Caspase-9 | CASP9 |
| 1046 | MOL002773 | beta-carotene | Caspase-3 | CASP3 |
| 1047 | MOL002773 | beta-carotene | Caspase-8 | CASP8 |
| 1048 | MOL002773 | beta-carotene | Cytochrome P450 3A4 | CYP3A4 |
| 1049 | MOL002773 | beta-carotene | Serum albumin | ALB |
| 1050 | MOL002773 | beta-carotene | Caveolin-1 | CAV1 |
| 1051 | MOL002773 | beta-carotene | Catenin beta-1 | CTNNB1 |
| 1052 | MOL002773 | beta-carotene | Myc proto-oncogene protein | MYC |
| 1053 | MOL002773 | beta-carotene | Caspase-7 | CASP7 |
| 1054 | MOL000358 | beta-sitosterol | Progesterone receptor | PGR |
| 1055 | MOL000358 | beta-sitosterol | Nuclear receptor coactivator 2 | NCOA2 |
| 1056 | MOL000358 | beta-sitosterol | Prostaglandin G/H synthase 1 | PTGS1 |
| 1057 | MOL000358 | beta-sitosterol | Muscarinic acetylcholine receptor M3 | CHRM3 |
| 1058 | MOL000358 | beta-sitosterol | Muscarinic acetylcholine receptor M1 | CHRM1 |
| 1059 | MOL000358 | beta-sitosterol | Muscarinic acetylcholine receptor M4 | CHRM4 |
| 1060 | MOL000358 | beta-sitosterol | Alpha-1A adrenergic receptor | ADRA1A |
| 1061 | MOL000358 | beta-sitosterol | Muscarinic acetylcholine receptor M2 | CHRM2 |
| 1062 | MOL000358 | beta-sitosterol | Neuronal acetylcholine receptor subunit alpha-2 | CHRNA2 |
| 1063 | MOL000358 | beta-sitosterol | Gamma-aminobutyric acid receptor subunit alpha-1 | GABRA1 |
| 1064 | MOL000358 | beta-sitosterol | Apoptosis regulator Bcl-2 | BCL2 |
| 1065 | MOL000358 | beta-sitosterol | Caspase-9 | CASP9 |
| 1066 | MOL000358 | beta-sitosterol | Caspase-3 | CASP3 |
| 1067 | MOL000358 | beta-sitosterol | Caspase-8 | CASP8 |
| 1068 | MOL000358 | beta-sitosterol | Protein kinase C alpha type | PRKCA |
| 1069 | MOL000358 | beta-sitosterol | Serum paraoxonase/arylesterase 1 | PON1 |
| 1070 | MOL000422 | kaempferol | Prostaglandin G/H synthase 1 | PTGS1 |
| 1071 | MOL000422 | kaempferol | Androgen receptor | AR |
| 1072 | MOL000422 | kaempferol | Peroxisome proliferator activated receptor gamma | PPARG |
| 1073 | MOL000422 | kaempferol | Nuclear receptor coactivator 2 | NCOA2 |
| 1074 | MOL000422 | kaempferol | Trypsin-1 | PRSS1 |
| 1075 | MOL000422 | kaempferol | Progesterone receptor | PGR |
| 1076 | MOL000422 | kaempferol | Muscarinic acetylcholine receptor M1 | CHRM1 |
| 1077 | MOL000422 | kaempferol | Acetylcholinesterase | ACHE |
| 1078 | MOL000422 | kaempferol | Muscarinic acetylcholine receptor M2 | CHRM2 |
| 1079 | MOL000422 | kaempferol | Gamma-aminobutyric acid receptor subunit alpha-1 | GABRA1 |
| 1080 | MOL000422 | kaempferol | Coagulation factor VII | F7 |
| 1081 | MOL000422 | kaempferol | Transcription factor p65 | RELA |
| 1082 | MOL000422 | kaempferol | Inhibitor of nuclear factor kappa-B kinase subunit beta | IKBKB |
| 1083 | MOL000422 | kaempferol | Apoptosis regulator Bcl-2 | BCL2 |
| 1084 | MOL000422 | kaempferol | Activator of 90 kDa heat shock protein ATPase homolog 1 | AHSA1 |
| 1085 | MOL000422 | kaempferol | Caspase-3 | CASP3 |
| 1086 | MOL000422 | kaempferol | Mitogen-activated protein kinase 8 | MAPK8 |
| 1087 | MOL000422 | kaempferol | Peroxisome proliferator-activated receptor gamma | PPARG |
| 1088 | MOL000422 | kaempferol | Cytochrome P450 3A4 | CYP3A4 |
| 1089 | MOL000422 | kaempferol | Cytochrome P450 1A1 | CYP1A1 |
| 1090 | MOL000422 | kaempferol | Intercellular adhesion molecule 1 | ICAM1 |
| 1091 | MOL000422 | kaempferol | E-selectin | SELE |
| 1092 | MOL000422 | kaempferol | Vascular cell adhesion protein 1 | VCAM1 |
| 1093 | MOL000422 | kaempferol | Cytochrome P450 1B1 | CYP1B1 |
| 1094 | MOL000422 | kaempferol | Arachidonate 5-lipoxygenase | ALOX5 |
| 1095 | MOL000422 | kaempferol | Glutathione S-transferase P | GSTP1 |
| 1096 | MOL000422 | kaempferol | Aryl hydrocarbon receptor | AHR |
| 1097 | MOL000422 | kaempferol | 26S proteasome non-ATPase regulatory subunit 3 | PSMD3 |
| 1098 | MOL000422 | kaempferol | Solute carrier family 2, facilitated glucose transporter member 4 | SLC2A4 |
| 1099 | MOL000422 | kaempferol | Nuclear receptor subfamily 1 group I member 3 | NR1I3 |
| 1100 | MOL000422 | kaempferol | Type I iodothyronine deiodinase | DIO1 |
| 1101 | MOL000422 | kaempferol | Glutathione S-transferase Mu 1 | GSTM1 |
| 1102 | MOL000422 | kaempferol | Glutathione S-transferase Mu 2 | GSTM2 |
| 1103 | MOL000422 | kaempferol | Aldo-keto reductase family 1 member C3 | AKR1C3 |
| 1104 | MOL000449 | Stigmasterol | Progesterone receptor | PGR |
| 1105 | MOL000449 | Stigmasterol | Mineralocorticoid receptor | NR3C2 |
| 1106 | MOL000449 | Stigmasterol | Nuclear receptor coactivator 2 | NCOA2 |
| 1107 | MOL000449 | Stigmasterol | Nuclear receptor coactivator 1 | NCOA1 |
| 1108 | MOL000449 | Stigmasterol | Prostaglandin G/H synthase 1 | PTGS1 |
| 1109 | MOL000449 | Stigmasterol | Aldose reductase | AKR1B1 |
| 1110 | MOL000449 | Stigmasterol | Urokinase-type plasminogen activator | PLAU |
| 1111 | MOL000449 | Stigmasterol | Chymotrypsinogen B | CTRB1 |
| 1112 | MOL000449 | Stigmasterol | Muscarinic acetylcholine receptor M3 | CHRM3 |
| 1113 | MOL000449 | Stigmasterol | Muscarinic acetylcholine receptor M1 | CHRM1 |
| 1114 | MOL000449 | Stigmasterol | Alpha-1A adrenergic receptor | ADRA1A |
| 1115 | MOL000449 | Stigmasterol | Muscarinic acetylcholine receptor M2 | CHRM2 |
| 1116 | MOL000449 | Stigmasterol | Gamma-aminobutyric acid receptor subunit alpha-1 | GABRA1 |
| 1117 | MOL000006 | luteolin | Prostaglandin G/H synthase 1 | PTGS1 |
| 1118 | MOL000006 | luteolin | Androgen receptor | AR |
| 1119 | MOL000006 | luteolin | Trypsin-1 | PRSS1 |
| 1120 | MOL000006 | luteolin | Nuclear receptor coactivator 2 | NCOA2 |
| 1121 | MOL000006 | luteolin | Transcription factor p65 | RELA |
| 1122 | MOL000006 | luteolin | Epidermal growth factor receptor | EGFR |
| 1123 | MOL000006 | luteolin | Vascular endothelial growth factor A | VEGFA |
| 1124 | MOL000006 | luteolin | G1/S-specific cyclin-D1 | CCND1 |
| 1125 | MOL000006 | luteolin | Caspase-9 | CASP9 |
| 1126 | MOL000006 | luteolin | Retinoblastoma-associated protein | RB1 |
| 1127 | MOL000006 | luteolin | Interleukin-6 | IL6 |
| 1128 | MOL000006 | luteolin | Caspase-3 | CASP3 |
| 1129 | MOL000006 | luteolin | Cellular tumor antigen p53 | TP63 |
| 1130 | MOL000006 | luteolin | NF-kappa-B inhibitor alpha | NFKBIA |
| 1131 | MOL000006 | luteolin | E3 ubiquitin-protein ligase Mdm2 | MDM2 |
| 1132 | MOL000006 | luteolin | Amyloid beta A4 protein | APP |
| 1133 | MOL000006 | luteolin | Proliferating cell nuclear antigen | PCNA |
| 1134 | MOL000006 | luteolin | Receptor tyrosine-protein kinase erbB-2 | ERBB2 |
| 1135 | MOL000006 | luteolin | Peroxisome proliferator-activated receptor gamma | PPARG |
| 1136 | MOL000006 | luteolin | Caspase-7 | CASP7 |
| 1137 | MOL000006 | luteolin | Intercellular adhesion molecule 1 | ICAM1 |
| 1138 | MOL000006 | luteolin | Induced myeloid leukemia cell differentiation protein Mcl-1 | MCL1 |
| 1139 | MOL000006 | luteolin | Baculoviral IAP repeat-containing protein 5 | BIRC5 |
| 1140 | MOL000006 | luteolin | G2/mitotic-specific cyclin-B1 | CCNB1 |
| 1141 | MOL000006 | luteolin | Tyrosinase | TYR |
| 1142 | MOL000006 | luteolin | Glutathione S-transferase P | GSTP1 |
| 1143 | MOL000006 | luteolin | Solute carrier family 2, facilitated glucose transporter member 4 | SLC2A4 |
| 1144 | MOL000006 | luteolin | Kinetochore protein Nuf2 | NUF2 |
| 1145 | MOL000953 | CLR | Progesterone receptor | PGR |
| 1146 | MOL000953 | CLR | Mineralocorticoid receptor | NR3C2 |
| 1147 | MOL000953 | CLR | Nuclear receptor coactivator 2 | NCOA2 |
| 1148 | MOL000098 | quercetin | Prostaglandin G/H synthase 1 | PTGS1 |
| 1149 | MOL000098 | quercetin | Androgen receptor | AR |
| 1150 | MOL000098 | quercetin | Peroxisome proliferator activated receptor gamma | PPARG |
| 1151 | MOL000098 | quercetin | Nuclear receptor coactivator 2 | NCOA2 |
| 1152 | MOL000098 | quercetin | Aldose reductase | AKR1B1 |
| 1153 | MOL000098 | quercetin | Trypsin-1 | PRSS1 |
| 1154 | MOL000098 | quercetin | Coagulation factor VII | F7 |
| 1155 | MOL000098 | quercetin | Acetylcholinesterase | ACHE |
| 1156 | MOL000098 | quercetin | Gamma-aminobutyric acid receptor subunit alpha-1 | GABRA1 |
| 1157 | MOL000098 | quercetin | Transcription factor p65 | RELA |
| 1158 | MOL000098 | quercetin | Epidermal growth factor receptor | EGFR |
| 1159 | MOL000098 | quercetin | Vascular endothelial growth factor A | VEGFA |
| 1160 | MOL000098 | quercetin | G1/S-specific cyclin-D1 | CCND1 |
| 1161 | MOL000098 | quercetin | Apoptosis regulator Bcl-2 | BCL2 |
| 1162 | MOL000098 | quercetin | Proto-oncogene c-Fos | FOS |
| 1163 | MOL000098 | quercetin | Eukaryotic translation initiation factor 6 | EIF6 |
| 1164 | MOL000098 | quercetin | Caspase-9 | CASP9 |
| 1165 | MOL000098 | quercetin | Urokinase-type plasminogen activator | PLAU |
| 1166 | MOL000098 | quercetin | Retinoblastoma-associated protein | RB1 |
| 1167 | MOL000098 | quercetin | Interleukin-6 | IL6 |
| 1168 | MOL000098 | quercetin | Activator of 90 kDa heat shock protein ATPase homolog 1 | AHSA1 |
| 1169 | MOL000098 | quercetin | Caspase-3 | CASP3 |
| 1170 | MOL000098 | quercetin | Cellular tumor antigen p53 | TP63 |
| 1171 | MOL000098 | quercetin | ETS domain-containing protein Elk-1 | ELK1 |
| 1172 | MOL000098 | quercetin | NF-kappa-B inhibitor alpha | NFKBIA |
| 1173 | MOL000098 | quercetin | NADPH--cytochrome P450 reductase | POR |
| 1174 | MOL000098 | quercetin | Caspase-8 | CASP8 |
| 1175 | MOL000098 | quercetin | RAF proto-oncogene serine/threonine-protein kinase | RAF1 |
| 1176 | MOL000098 | quercetin | Protein kinase C alpha type | PRKCA |
| 1177 | MOL000098 | quercetin | Hypoxia-inducible factor 1-alpha | HIF1A |
| 1178 | MOL000098 | quercetin | Protein CBFA2T1 | RUNX1T1 |
| 1179 | MOL000098 | quercetin | Receptor tyrosine-protein kinase erbB-2 | ERBB2 |
| 1180 | MOL000098 | quercetin | Peroxisome proliferator-activated receptor gamma | PPARG |
| 1181 | MOL000098 | quercetin | Acetyl-CoA carboxylase 1 | ACACA |
| 1182 | MOL000098 | quercetin | Cytochrome P450 3A4 | CYP3A4 |
| 1183 | MOL000098 | quercetin | Caveolin-1 | CAV1 |
| 1184 | MOL000098 | quercetin | Myc proto-oncogene protein | MYC |
| 1185 | MOL000098 | quercetin | Cytochrome P450 1A1 | CYP1A1 |
| 1186 | MOL000098 | quercetin | Intercellular adhesion molecule 1 | ICAM1 |
| 1187 | MOL000098 | quercetin | E-selectin | SELE |
| 1188 | MOL000098 | quercetin | Vascular cell adhesion protein 1 | VCAM1 |
| 1189 | MOL000098 | quercetin | Prostaglandin E2 receptor EP3 subtype | PTGER3 |
| 1190 | MOL000098 | quercetin | Baculoviral IAP repeat-containing protein 5 | BIRC5 |
| 1191 | MOL000098 | quercetin | Dual oxidase 2 | DUOX2 |
| 1192 | MOL000098 | quercetin | Nitric oxide synthase, endothelial | NOS3 |
| 1193 | MOL000098 | quercetin | Heat shock protein beta-1 | HSPB1 |
| 1194 | MOL000098 | quercetin | Maltase-glucoamylase, intestinal | MGAM |
| 1195 | MOL000098 | quercetin | Cytochrome P450 1B1 | CYP1B1 |
| 1196 | MOL000098 | quercetin | G2/mitotic-specific cyclin-B1 | CCNB1 |
| 1197 | MOL000098 | quercetin | Arachidonate 5-lipoxygenase | ALOX5 |
| 1198 | MOL000098 | quercetin | Glutathione S-transferase P | GSTP1 |
| 1199 | MOL000098 | quercetin | Nuclear factor erythroid 2-related factor 2 | NFE2L2 |
| 1200 | MOL000098 | quercetin | NAD(P)H dehydrogenase [quinone] 1 | NQO1 |
| 1201 | MOL000098 | quercetin | Poly [ADP-ribose] polymerase 1 | PARP1 |
| 1202 | MOL000098 | quercetin | Aryl hydrocarbon receptor | AHR |
| 1203 | MOL000098 | quercetin | 26S proteasome non-ATPase regulatory subunit 3 | PSMD3 |
| 1204 | MOL000098 | quercetin | Solute carrier family 2, facilitated glucose transporter member 4 | SLC2A4 |
| 1205 | MOL000098 | quercetin | Collagen alpha-1(III) chain | COL3A1 |
| 1206 | MOL000098 | quercetin | DDB1- and CUL4-associated factor 5 | DCAF5 |
| 1207 | MOL000098 | quercetin | Nuclear receptor subfamily 1 group I member 3 | NR1I3 |
| 1208 | MOL000098 | quercetin | Serine/threonine-protein kinase Chk2 | CHEK2 |
| 1209 | MOL000098 | quercetin | Heat shock factor protein 1 | HSF1 |
| 1210 | MOL000098 | quercetin | C-reactive protein | CRP |
| 1211 | MOL000098 | quercetin | Runt-related transcription factor 2 | RUNX2 |
| 1212 | MOL000098 | quercetin | Ras association domain-containing protein 1 | RASSF1 |
| 1213 | MOL000098 | quercetin | Cathepsin D | CTSD |
| 1214 | MOL000098 | quercetin | Insulin-like growth factor-binding protein 3 | IGFBP3 |
| 1215 | MOL000098 | quercetin | Insulin-like growth factor II | IGF2 |
| 1216 | MOL000098 | quercetin | Interferon regulatory factor 1 | IRF1 |
| 1217 | MOL000098 | quercetin | Receptor tyrosine-protein kinase erbB-3 | ERBB3 |
| 1218 | MOL000098 | quercetin | Serum paraoxonase/arylesterase 1 | PON1 |
| 1219 | MOL000098 | quercetin | Type I iodothyronine deiodinase | DIO1 |
| 1220 | MOL000098 | quercetin | Puromycin-sensitive aminopeptidase | NPEPPS |
| 1221 | MOL000098 | quercetin | Hexokinase-2 | HK2 |
| 1222 | MOL000098 | quercetin | Ras GTPase-activating protein 1 | RASA1 |
| 1223 | MOL000098 | quercetin | Glutathione S-transferase Mu 1 | GSTM1 |
| 1224 | MOL000098 | quercetin | Glutathione S-transferase Mu 2 | GSTM2 |
| 1225 | MOL001689 | acacetin | Prostaglandin G/H synthase 1 | PTGS1 |
| 1226 | MOL001689 | acacetin | Androgen receptor | AR |
| 1227 | MOL001689 | acacetin | Trypsin-1 | PRSS1 |
| 1228 | MOL001689 | acacetin | Nuclear receptor coactivator 2 | NCOA2 |
| 1229 | MOL001689 | acacetin | Nuclear receptor coactivator 1 | NCOA1 |
| 1230 | MOL001689 | acacetin | Serine/threonine-protein kinase Chk1 | CHEK1 |
| 1231 | MOL001689 | acacetin | Transcription factor p65 | RELA |
| 1232 | MOL001689 | acacetin | Apoptosis regulator Bcl-2 | BCL2 |
| 1233 | MOL001689 | acacetin | Caspase-3 | CASP3 |
| 1234 | MOL001689 | acacetin | Cellular tumor antigen p53 | TP63 |
| 1235 | MOL001689 | acacetin | Caspase-8 | CASP8 |
| 1236 | MOL001689 | acacetin | Fatty acid synthase | FASN |
| 1237 | MOL004355 | Spinasterol | Progesterone receptor | PGR |
| 1238 | MOL004355 | Spinasterol | Mineralocorticoid receptor | NR3C2 |
| 1239 | MOL004355 | Spinasterol | Nuclear receptor coactivator 2 | NCOA2 |
| 1240 | MOL004580 | cis-Dihydroquercetin | Prostaglandin G/H synthase 1 | PTGS1 |
| 1241 | MOL004580 | cis-Dihydroquercetin | Aldose reductase | AKR1B1 |
| 1242 | MOL000006 | luteolin | Prostaglandin G/H synthase 1 | PTGS1 |
| 1243 | MOL000006 | luteolin | Androgen receptor | AR |
| 1244 | MOL000006 | luteolin | Trypsin-1 | PRSS1 |
| 1245 | MOL000006 | luteolin | Nuclear receptor coactivator 2 | NCOA2 |
| 1246 | MOL000006 | luteolin | Transcription factor p65 | RELA |
| 1247 | MOL000006 | luteolin | Epidermal growth factor receptor | EGFR |
| 1248 | MOL000006 | luteolin | Vascular endothelial growth factor A | VEGFA |
| 1249 | MOL000006 | luteolin | G1/S-specific cyclin-D1 | CCND1 |
| 1250 | MOL000006 | luteolin | Caspase-9 | CASP9 |
| 1251 | MOL000006 | luteolin | Retinoblastoma-associated protein | RB1 |
| 1252 | MOL000006 | luteolin | Interleukin-6 | IL6 |
| 1253 | MOL000006 | luteolin | Caspase-3 | CASP3 |
| 1254 | MOL000006 | luteolin | Cellular tumor antigen p53 | TP63 |
| 1255 | MOL000006 | luteolin | NF-kappa-B inhibitor alpha | NFKBIA |
| 1256 | MOL000006 | luteolin | E3 ubiquitin-protein ligase Mdm2 | MDM2 |
| 1257 | MOL000006 | luteolin | Amyloid beta A4 protein | APP |
| 1258 | MOL000006 | luteolin | Proliferating cell nuclear antigen | PCNA |
| 1259 | MOL000006 | luteolin | Receptor tyrosine-protein kinase erbB-2 | ERBB2 |
| 1260 | MOL000006 | luteolin | Peroxisome proliferator-activated receptor gamma | PPARG |
| 1261 | MOL000006 | luteolin | Caspase-7 | CASP7 |
| 1262 | MOL000006 | luteolin | Intercellular adhesion molecule 1 | ICAM1 |
| 1263 | MOL000006 | luteolin | Induced myeloid leukemia cell differentiation protein Mcl-1 | MCL1 |
| 1264 | MOL000006 | luteolin | Baculoviral IAP repeat-containing protein 5 | BIRC5 |
| 1265 | MOL000006 | luteolin | G2/mitotic-specific cyclin-B1 | CCNB1 |
| 1266 | MOL000006 | luteolin | Tyrosinase | TYR |
| 1267 | MOL000006 | luteolin | Glutathione S-transferase P | GSTP1 |
| 1268 | MOL000006 | luteolin | Solute carrier family 2, facilitated glucose transporter member 4 | SLC2A4 |
| 1269 | MOL000006 | luteolin | Kinetochore protein Nuf2 | NUF2 |
| 1270 | MOL012286 | Betavulgarin | Prostaglandin G/H synthase 1 | PTGS1 |
| 1271 | MOL012286 | Betavulgarin | Estrogen receptor | ESR1 |
| 1272 | MOL012286 | Betavulgarin | Androgen receptor | AR |
| 1273 | MOL012286 | Betavulgarin | Peroxisome proliferator activated receptor gamma | PPARG |
| 1274 | MOL012286 | Betavulgarin | Coagulation factor VII | F7 |
| 1275 | MOL012286 | Betavulgarin | Estrogen receptor beta | ESR2 |
| 1276 | MOL012286 | Betavulgarin | Glycogen synthase kinase-3 beta | GSK3B |
| 1277 | MOL012286 | Betavulgarin | Serine/threonine-protein kinase Chk1 | CHEK1 |
| 1278 | MOL012286 | Betavulgarin | Trypsin-1 | PRSS1 |
| 1279 | MOL012298 | Rubrosterone | Mineralocorticoid receptor | NR3C2 |
| 1280 | MOL000358 | beta-sitosterol | Progesterone receptor | PGR |
| 1281 | MOL000358 | beta-sitosterol | Nuclear receptor coactivator 2 | NCOA2 |
| 1282 | MOL000358 | beta-sitosterol | Prostaglandin G/H synthase 1 | PTGS1 |
| 1283 | MOL000358 | beta-sitosterol | Muscarinic acetylcholine receptor M3 | CHRM3 |
| 1284 | MOL000358 | beta-sitosterol | Muscarinic acetylcholine receptor M1 | CHRM1 |
| 1285 | MOL000358 | beta-sitosterol | Muscarinic acetylcholine receptor M4 | CHRM4 |
| 1286 | MOL000358 | beta-sitosterol | Alpha-1A adrenergic receptor | ADRA1A |
| 1287 | MOL000358 | beta-sitosterol | Muscarinic acetylcholine receptor M2 | CHRM2 |
| 1288 | MOL000358 | beta-sitosterol | Neuronal acetylcholine receptor subunit alpha-2 | CHRNA2 |
| 1289 | MOL000358 | beta-sitosterol | Gamma-aminobutyric acid receptor subunit alpha-1 | GABRA1 |
| 1290 | MOL000358 | beta-sitosterol | Apoptosis regulator Bcl-2 | BCL2 |
| 1291 | MOL000358 | beta-sitosterol | Caspase-9 | CASP9 |
| 1292 | MOL000358 | beta-sitosterol | Caspase-3 | CASP3 |
| 1293 | MOL000358 | beta-sitosterol | Caspase-8 | CASP8 |
| 1294 | MOL000358 | beta-sitosterol | Protein kinase C alpha type | PRKCA |
| 1295 | MOL000358 | beta-sitosterol | Serum paraoxonase/arylesterase 1 | PON1 |
| 1296 | MOL000098 | quercetin | Prostaglandin G/H synthase 1 | PTGS1 |
| 1297 | MOL000098 | quercetin | Androgen receptor | AR |
| 1298 | MOL000098 | quercetin | Peroxisome proliferator activated receptor gamma | PPARG |
| 1299 | MOL000098 | quercetin | Nuclear receptor coactivator 2 | NCOA2 |
| 1300 | MOL000098 | quercetin | Aldose reductase | AKR1B1 |
| 1301 | MOL000098 | quercetin | Trypsin-1 | PRSS1 |
| 1302 | MOL000098 | quercetin | Coagulation factor VII | F7 |
| 1303 | MOL000098 | quercetin | Acetylcholinesterase | ACHE |
| 1304 | MOL000098 | quercetin | Gamma-aminobutyric acid receptor subunit alpha-1 | GABRA1 |
| 1305 | MOL000098 | quercetin | Transcription factor p65 | RELA |
| 1306 | MOL000098 | quercetin | Epidermal growth factor receptor | EGFR |
| 1307 | MOL000098 | quercetin | Vascular endothelial growth factor A | VEGFA |
| 1308 | MOL000098 | quercetin | G1/S-specific cyclin-D1 | CCND1 |
| 1309 | MOL000098 | quercetin | Apoptosis regulator Bcl-2 | BCL2 |
| 1310 | MOL000098 | quercetin | Proto-oncogene c-Fos | FOS |
| 1311 | MOL000098 | quercetin | Eukaryotic translation initiation factor 6 | EIF6 |
| 1312 | MOL000098 | quercetin | Caspase-9 | CASP9 |
| 1313 | MOL000098 | quercetin | Urokinase-type plasminogen activator | PLAU |
| 1314 | MOL000098 | quercetin | Retinoblastoma-associated protein | RB1 |
| 1315 | MOL000098 | quercetin | Interleukin-6 | IL6 |
| 1316 | MOL000098 | quercetin | Activator of 90 kDa heat shock protein ATPase homolog 1 | AHSA1 |
| 1317 | MOL000098 | quercetin | Caspase-3 | CASP3 |
| 1318 | MOL000098 | quercetin | Cellular tumor antigen p53 | TP63 |
| 1319 | MOL000098 | quercetin | ETS domain-containing protein Elk-1 | ELK1 |
| 1320 | MOL000098 | quercetin | NF-kappa-B inhibitor alpha | NFKBIA |
| 1321 | MOL000098 | quercetin | NADPH--cytochrome P450 reductase | POR |
| 1322 | MOL000098 | quercetin | Caspase-8 | CASP8 |
| 1323 | MOL000098 | quercetin | RAF proto-oncogene serine/threonine-protein kinase | RAF1 |
| 1324 | MOL000098 | quercetin | Protein kinase C alpha type | PRKCA |
| 1325 | MOL000098 | quercetin | Hypoxia-inducible factor 1-alpha | HIF1A |
| 1326 | MOL000098 | quercetin | Protein CBFA2T1 | RUNX1T1 |
| 1327 | MOL000098 | quercetin | Receptor tyrosine-protein kinase erbB-2 | ERBB2 |
| 1328 | MOL000098 | quercetin | Peroxisome proliferator-activated receptor gamma | PPARG |
| 1329 | MOL000098 | quercetin | Acetyl-CoA carboxylase 1 | ACACA |
| 1330 | MOL000098 | quercetin | Cytochrome P450 3A4 | CYP3A4 |
| 1331 | MOL000098 | quercetin | Caveolin-1 | CAV1 |
| 1332 | MOL000098 | quercetin | Myc proto-oncogene protein | MYC |
| 1333 | MOL000098 | quercetin | Cytochrome P450 1A1 | CYP1A1 |
| 1334 | MOL000098 | quercetin | Intercellular adhesion molecule 1 | ICAM1 |
| 1335 | MOL000098 | quercetin | E-selectin | SELE |
| 1336 | MOL000098 | quercetin | Vascular cell adhesion protein 1 | VCAM1 |
| 1337 | MOL000098 | quercetin | Prostaglandin E2 receptor EP3 subtype | PTGER3 |
| 1338 | MOL000098 | quercetin | Baculoviral IAP repeat-containing protein 5 | BIRC5 |
| 1339 | MOL000098 | quercetin | Dual oxidase 2 | DUOX2 |
| 1340 | MOL000098 | quercetin | Nitric oxide synthase, endothelial | NOS3 |
| 1341 | MOL000098 | quercetin | Heat shock protein beta-1 | HSPB1 |
| 1342 | MOL000098 | quercetin | Maltase-glucoamylase, intestinal | MGAM |
| 1343 | MOL000098 | quercetin | Cytochrome P450 1B1 | CYP1B1 |
| 1344 | MOL000098 | quercetin | G2/mitotic-specific cyclin-B1 | CCNB1 |
| 1345 | MOL000098 | quercetin | Arachidonate 5-lipoxygenase | ALOX5 |
| 1346 | MOL000098 | quercetin | Glutathione S-transferase P | GSTP1 |
| 1347 | MOL000098 | quercetin | Nuclear factor erythroid 2-related factor 2 | NFE2L2 |
| 1348 | MOL000098 | quercetin | NAD(P)H dehydrogenase [quinone] 1 | NQO1 |
| 1349 | MOL000098 | quercetin | Poly [ADP-ribose] polymerase 1 | PARP1 |
| 1350 | MOL000098 | quercetin | Aryl hydrocarbon receptor | AHR |
| 1351 | MOL000098 | quercetin | 26S proteasome non-ATPase regulatory subunit 3 | PSMD3 |
| 1352 | MOL000098 | quercetin | Solute carrier family 2, facilitated glucose transporter member 4 | SLC2A4 |
| 1353 | MOL000098 | quercetin | Collagen alpha-1(III) chain | COL3A1 |
| 1354 | MOL000098 | quercetin | DDB1- and CUL4-associated factor 5 | DCAF5 |
| 1355 | MOL000098 | quercetin | Nuclear receptor subfamily 1 group I member 3 | NR1I3 |
| 1356 | MOL000098 | quercetin | Serine/threonine-protein kinase Chk2 | CHEK2 |
| 1357 | MOL000098 | quercetin | Heat shock factor protein 1 | HSF1 |
| 1358 | MOL000098 | quercetin | C-reactive protein | CRP |
| 1359 | MOL000098 | quercetin | Runt-related transcription factor 2 | RUNX2 |
| 1360 | MOL000098 | quercetin | Ras association domain-containing protein 1 | RASSF1 |
| 1361 | MOL000098 | quercetin | Cathepsin D | CTSD |
| 1362 | MOL000098 | quercetin | Insulin-like growth factor-binding protein 3 | IGFBP3 |
| 1363 | MOL000098 | quercetin | Insulin-like growth factor II | IGF2 |
| 1364 | MOL000098 | quercetin | Interferon regulatory factor 1 | IRF1 |
| 1365 | MOL000098 | quercetin | Receptor tyrosine-protein kinase erbB-3 | ERBB3 |
| 1366 | MOL000098 | quercetin | Serum paraoxonase/arylesterase 1 | PON1 |
| 1367 | MOL000098 | quercetin | Type I iodothyronine deiodinase | DIO1 |
| 1368 | MOL000098 | quercetin | Puromycin-sensitive aminopeptidase | NPEPPS |
| 1369 | MOL000098 | quercetin | Hexokinase-2 | HK2 |
| 1370 | MOL000098 | quercetin | Ras GTPase-activating protein 1 | RASA1 |
| 1371 | MOL000098 | quercetin | Glutathione S-transferase Mu 1 | GSTM1 |
| 1372 | MOL000098 | quercetin | Glutathione S-transferase Mu 2 | GSTM2 |
| 1373 | MOL000359 | sitosterol | Progesterone receptor | PGR |
| 1374 | MOL000359 | sitosterol | Nuclear receptor coactivator 2 | NCOA2 |
| 1375 | MOL000359 | sitosterol | Mineralocorticoid receptor | NR3C2 |
| 1376 | MOL000449 | Stigmasterol | Progesterone receptor | PGR |
| 1377 | MOL000449 | Stigmasterol | Mineralocorticoid receptor | NR3C2 |
| 1378 | MOL000449 | Stigmasterol | Nuclear receptor coactivator 2 | NCOA2 |
| 1379 | MOL000449 | Stigmasterol | Nuclear receptor coactivator 1 | NCOA1 |
| 1380 | MOL000449 | Stigmasterol | Prostaglandin G/H synthase 1 | PTGS1 |
| 1381 | MOL000449 | Stigmasterol | Aldose reductase | AKR1B1 |
| 1382 | MOL000449 | Stigmasterol | Urokinase-type plasminogen activator | PLAU |
| 1383 | MOL000449 | Stigmasterol | Chymotrypsinogen B | CTRB1 |
| 1384 | MOL000449 | Stigmasterol | Muscarinic acetylcholine receptor M3 | CHRM3 |
| 1385 | MOL000449 | Stigmasterol | Muscarinic acetylcholine receptor M1 | CHRM1 |
| 1386 | MOL000449 | Stigmasterol | Alpha-1A adrenergic receptor | ADRA1A |
| 1387 | MOL000449 | Stigmasterol | Muscarinic acetylcholine receptor M2 | CHRM2 |
| 1388 | MOL000449 | Stigmasterol | Gamma-aminobutyric acid receptor subunit alpha-1 | GABRA1 |
| 1389 | MOL001323 | Sitosterol alpha1 | Progesterone receptor | PGR |
| 1390 | MOL001323 | Sitosterol alpha1 | Gamma-aminobutyric acid receptor subunit alpha-1 | GABRA1 |
| 1391 | MOL001323 | Sitosterol alpha1 | Mineralocorticoid receptor | NR3C2 |
| 1392 | MOL001328 | 2,3-didehydro GA70 | Prostaglandin G/H synthase 1 | PTGS1 |
| 1393 | MOL001328 | 2,3-didehydro GA70 | Muscarinic acetylcholine receptor M1 | CHRM1 |
| 1394 | MOL001328 | 2,3-didehydro GA70 | Gamma-aminobutyric acid receptor subunit alpha-1 | GABRA1 |
| 1395 | MOL001328 | 2,3-didehydro GA70 | Trypsin-1 | PRSS1 |
| 1396 | MOL001328 | 2,3-didehydro GA70 | Glutamate receptor 2 | GRIA2 |
| 1397 | MOL001329 | 2,3-didehydro GA77 | Gamma-aminobutyric acid receptor subunit alpha-1 | GABRA1 |
| 1398 | MOL001329 | 2,3-didehydro GA77 | Nuclear receptor coactivator 2 | NCOA2 |
| 1399 | MOL001340 | GA120 | Muscarinic acetylcholine receptor M3 | CHRM3 |
| 1400 | MOL001340 | GA120 | Muscarinic acetylcholine receptor M1 | CHRM1 |
| 1401 | MOL001340 | GA120 | Muscarinic acetylcholine receptor M2 | CHRM2 |
| 1402 | MOL001340 | GA120 | Gamma-aminobutyric acid receptor subunit alpha-1 | GABRA1 |
| 1403 | MOL001342 | GA121-isolactone | Progesterone receptor | PGR |
| 1404 | MOL001344 | GA122-isolactone | Progesterone receptor | PGR |
| 1405 | MOL001349 | 4a-formyl-7alpha-hydroxy-1-methyl-8-methylidene-4aalpha,4bbeta-gibbane-1alpha,10beta-dicarboxylic acid | Mineralocorticoid receptor | NR3C2 |
| 1406 | MOL001349 | 4a-formyl-7alpha-hydroxy-1-methyl-8-methylidene-4aalpha,4bbeta-gibbane-1alpha,10beta-dicarboxylic acid | Progesterone receptor | PGR |
| 1407 | MOL001351 | Gibberellin A44 | Mineralocorticoid receptor | NR3C2 |
| 1408 | MOL001351 | Gibberellin A44 | Gamma-aminobutyric acid receptor subunit alpha-1 | GABRA1 |
| 1409 | MOL001352 | GA54 | Nuclear receptor coactivator 2 | NCOA2 |
| 1410 | MOL001353 | GA60 | Muscarinic acetylcholine receptor M2 | CHRM2 |
| 1411 | MOL001353 | GA60 | Gamma-aminobutyric acid receptor subunit alpha-1 | GABRA1 |
| 1412 | MOL001353 | GA60 | Glutamate receptor 2 | GRIA2 |
| 1413 | MOL001355 | GA63 | Gamma-aminobutyric acid receptor subunit alpha-1 | GABRA1 |
| 1414 | MOL001355 | GA63 | Glutamate receptor 2 | GRIA2 |
| 1415 | MOL001358 | gibberellin 7 | Muscarinic acetylcholine receptor M3 | CHRM3 |
| 1416 | MOL001358 | gibberellin 7 | Muscarinic acetylcholine receptor M1 | CHRM1 |
| 1417 | MOL001360 | GA77 | Gamma-aminobutyric acid receptor subunit alpha-1 | GABRA1 |
| 1418 | MOL001360 | GA77 | Glutamate receptor 2 | GRIA2 |
| 1419 | MOL001368 | 3-O-p-coumaroylquinic acid | Prostaglandin G/H synthase 1 | PTGS1 |
| 1420 | MOL001368 | 3-O-p-coumaroylquinic acid | Nuclear receptor coactivator 2 | NCOA2 |
| 1421 | MOL000296 | hederagenin | Progesterone receptor | PGR |
| 1422 | MOL000296 | hederagenin | Nuclear receptor coactivator 2 | NCOA2 |
| 1423 | MOL000296 | hederagenin | Muscarinic acetylcholine receptor M3 | CHRM3 |
| 1424 | MOL000296 | hederagenin | Muscarinic acetylcholine receptor M1 | CHRM1 |
| 1425 | MOL000296 | hederagenin | Muscarinic acetylcholine receptor M2 | CHRM2 |
| 1426 | MOL000296 | hederagenin | Gamma-aminobutyric acid receptor subunit alpha-1 | GABRA1 |
| 1427 | MOL000296 | hederagenin | Glutamate receptor 2 | GRIA2 |
| 1428 | MOL000296 | hederagenin | Alcohol dehydrogenase 1B | ADH1B |
| 1429 | MOL000296 | hederagenin | Prostaglandin G/H synthase 1 | PTGS1 |
| 1430 | MOL000358 | beta-sitosterol | Progesterone receptor | PGR |
| 1431 | MOL000358 | beta-sitosterol | Nuclear receptor coactivator 2 | NCOA2 |
| 1432 | MOL000358 | beta-sitosterol | Prostaglandin G/H synthase 1 | PTGS1 |
| 1433 | MOL000358 | beta-sitosterol | Muscarinic acetylcholine receptor M3 | CHRM3 |
| 1434 | MOL000358 | beta-sitosterol | Muscarinic acetylcholine receptor M1 | CHRM1 |
| 1435 | MOL000358 | beta-sitosterol | Muscarinic acetylcholine receptor M4 | CHRM4 |
| 1436 | MOL000358 | beta-sitosterol | Alpha-1A adrenergic receptor | ADRA1A |
| 1437 | MOL000358 | beta-sitosterol | Muscarinic acetylcholine receptor M2 | CHRM2 |
| 1438 | MOL000358 | beta-sitosterol | Neuronal acetylcholine receptor subunit alpha-2 | CHRNA2 |
| 1439 | MOL000358 | beta-sitosterol | Gamma-aminobutyric acid receptor subunit alpha-1 | GABRA1 |
| 1440 | MOL000358 | beta-sitosterol | Apoptosis regulator Bcl-2 | BCL2 |
| 1441 | MOL000358 | beta-sitosterol | Caspase-9 | CASP9 |
| 1442 | MOL000358 | beta-sitosterol | Caspase-3 | CASP3 |
| 1443 | MOL000358 | beta-sitosterol | Caspase-8 | CASP8 |
| 1444 | MOL000358 | beta-sitosterol | Protein kinase C alpha type | PRKCA |
| 1445 | MOL000358 | beta-sitosterol | Serum paraoxonase/arylesterase 1 | PON1 |
| 1446 | MOL000493 | campesterol | Progesterone receptor | PGR |
| 1447 | MOL000493 | campesterol | Prostaglandin G/H synthase 1 | PTGS1 |
| 1448 | MOL000493 | campesterol | Nuclear receptor coactivator 2 | NCOA2 |
| 1449 | MOL002341 | Hesperetin | Prostaglandin G/H synthase 1 | PTGS1 |
| 1450 | MOL002341 | Hesperetin | Nuclear receptor coactivator 2 | NCOA2 |
| 1451 | MOL002341 | Hesperetin | Nuclear receptor coactivator 1 | NCOA1 |
| 1452 | MOL000358 | beta-sitosterol | Progesterone receptor | PGR |
| 1453 | MOL000358 | beta-sitosterol | Nuclear receptor coactivator 2 | NCOA2 |
| 1454 | MOL000358 | beta-sitosterol | Prostaglandin G/H synthase 1 | PTGS1 |
| 1455 | MOL000358 | beta-sitosterol | Muscarinic acetylcholine receptor M3 | CHRM3 |
| 1456 | MOL000358 | beta-sitosterol | Muscarinic acetylcholine receptor M1 | CHRM1 |
| 1457 | MOL000358 | beta-sitosterol | Muscarinic acetylcholine receptor M4 | CHRM4 |
| 1458 | MOL000358 | beta-sitosterol | Alpha-1A adrenergic receptor | ADRA1A |
| 1459 | MOL000358 | beta-sitosterol | Muscarinic acetylcholine receptor M2 | CHRM2 |
| 1460 | MOL000358 | beta-sitosterol | Neuronal acetylcholine receptor subunit alpha-2 | CHRNA2 |
| 1461 | MOL000358 | beta-sitosterol | Gamma-aminobutyric acid receptor subunit alpha-1 | GABRA1 |
| 1462 | MOL000358 | beta-sitosterol | Apoptosis regulator Bcl-2 | BCL2 |
| 1463 | MOL000358 | beta-sitosterol | Caspase-9 | CASP9 |
| 1464 | MOL000358 | beta-sitosterol | Caspase-3 | CASP3 |
| 1465 | MOL000358 | beta-sitosterol | Caspase-8 | CASP8 |
| 1466 | MOL000358 | beta-sitosterol | Protein kinase C alpha type | PRKCA |
| 1467 | MOL000358 | beta-sitosterol | Serum paraoxonase/arylesterase 1 | PON1 |
| 1468 | MOL004328 | naringenin | Prostaglandin G/H synthase 1 | PTGS1 |
| 1469 | MOL004328 | naringenin | Estrogen receptor | ESR1 |
| 1470 | MOL004328 | naringenin | Transcription factor p65 | RELA |
| 1471 | MOL004328 | naringenin | Apoptosis regulator Bcl-2 | BCL2 |
| 1472 | MOL004328 | naringenin | Caspase-3 | CASP3 |
| 1473 | MOL004328 | naringenin | Fatty acid synthase | FASN |
| 1474 | MOL004328 | naringenin | Low-density lipoprotein receptor | LDLR |
| 1475 | MOL004328 | naringenin | Peroxisome proliferator-activated receptor gamma | PPARG |
| 1476 | MOL004328 | naringenin | Microsomal triglyceride transfer protein large subunit | MTTP |
| 1477 | MOL004328 | naringenin | Apolipoprotein B-100 | APOB |
| 1478 | MOL004328 | naringenin | Glutathione S-transferase P | GSTP1 |
| 1479 | MOL004328 | naringenin | Sterol regulatory element-binding protein 1 | SREBF1 |
| 1480 | MOL004328 | naringenin | Multidrug resistance-associated protein 1 | ABCC1 |
| 1481 | MOL004328 | naringenin | Aldo-keto reductase family 1 member C1 | AKR1C1 |
| 1482 | MOL004328 | naringenin | 4-aminobutyrate aminotransferase, mitochondrial | ABAT |
| 1483 | MOL005828 | nobiletin | Prostaglandin G/H synthase 1 | PTGS1 |
| 1484 | MOL005828 | nobiletin | Estrogen receptor | ESR1 |
| 1485 | MOL005828 | nobiletin | Androgen receptor | AR |
| 1486 | MOL005828 | nobiletin | Peroxisome proliferator activated receptor gamma | PPARG |
| 1487 | MOL005828 | nobiletin | Coagulation factor VII | F7 |
| 1488 | MOL005828 | nobiletin | Estrogen receptor beta | ESR2 |
| 1489 | MOL005828 | nobiletin | Serine/threonine-protein kinase Chk1 | CHEK1 |
| 1490 | MOL005828 | nobiletin | Trypsin-1 | PRSS1 |
| 1491 | MOL005828 | nobiletin | Nuclear receptor coactivator 2 | NCOA2 |
| 1492 | MOL005828 | nobiletin | Glycogen synthase kinase-3 beta | GSK3B |
| 1493 | MOL005828 | nobiletin | Apoptosis regulator Bcl-2 | BCL2 |
| 1494 | MOL005828 | nobiletin | Caspase-9 | CASP9 |
| 1495 | MOL005828 | nobiletin | Cellular tumor antigen p53 | TP63 |
| 1496 | MOL005828 | nobiletin | Mitogen-activated protein kinase 8 | MAPK8 |
| 1497 | MOL005828 | nobiletin | Metalloproteinase inhibitor 1 | TIMP1 |
| 1498 | MOL005828 | nobiletin | Peroxisome proliferator-activated receptor gamma | PPARG |
| 1499 | MOL005828 | nobiletin | Scavenger receptor cysteine-rich type 1 protein M130 | CD163 |
| 1500 | MOL005828 | nobiletin | Ephrin type-B receptor 2 | EPHB2 |
|  |  |  |  |  |
